1 **Contrasting adaptations to synaptic physiology of**  
2 **prefrontal cortex interneuron subtypes in a mouse**  
3 **model of binge drinking**

4  
5 Max E. Joffe<sup>†,a,b,c</sup>, Danny G. Winder<sup>\*,a,c,d</sup>, and P. Jeffrey Conn<sup>\*,a,b,c</sup>

- 6  
7  
8 a. Department of Pharmacology, Vanderbilt University, Nashville, TN, 37232, USA.  
9 b. Vanderbilt Center for Neuroscience Drug Discovery, Nashville, TN, 37232, USA  
10 c. Vanderbilt Center for Addiction Research, Nashville, TN, 37232, USA  
11 d. Department of Molecular Physiology and Biophysics, Vanderbilt University, Nashville, TN,  
12 37232, USA

13  
14  
15  
16 \*Equal contribution

17  
18 †Correspondence to:  
19 Max E. Joffe, Ph.D.  
20 Postdoctoral Fellow  
21 Vanderbilt University  
22 12475E MRB4  
23 Nashville, TN 37232-0697  
24 E-Mail: [max.joffe@vanderbilt.edu](mailto:max.joffe@vanderbilt.edu)  
25 Twitter: @mejoffe  
26

27  
28 Short title: Drinking-induced synaptic adaptations to cortical interneurons  
29

30  
31 Key words: alcohol, prefrontal cortex, sex differences, synaptic physiology, parvalbumin,  
32 somatostatin  
33

34  
35  
36 Article Type: Research  
37 Abstract: 248 words  
38 Article: 4846 words  
39 Figures: 6  
40 Tables: 0  
41 References: 70  
42 Supplemental Information: 1 figure

43 **Abstract**

44 Alcohol use disorder (AUD) affects all sexes, however women who develop AUD may be  
45 particularly susceptible to cravings and other components of the disease. While many brain  
46 regions are involved in AUD etiology, proper function of the prefrontal cortex (PFC) is  
47 particularly important for top-down craving management and the moderation of drinking  
48 behaviors. Essential regulation of PFC output is provided by local inhibitory interneurons, yet the  
49 effects of chronic drinking on interneuron physiology remain poorly understood, particularly in  
50 female individuals. To address this gap, we generated fluorescent reporter transgenic mice to  
51 label the two major classes of interneuron in deep layer prelimbic PFC, based on expression of  
52 parvalbumin (PV-IN) or somatostatin (SST-IN). We then interrogated PV-IN and SST-IN  
53 membrane and synaptic physiology in a rodent model of binge drinking. Beginning in late  
54 adolescence, mice received 3-4 weeks of intermittent access (IA) ethanol. One day after the last  
55 drinking session, adaptations to PV-IN and SST-IN intrinsic physiology were observed in male  
56 mice but not in female mice. Furthermore, IA ethanol precipitated diametrically opposing  
57 changes to PV-IN synaptic physiology based on sex. IA ethanol decreased excitatory synaptic  
58 strength onto PV-INs from female mice and potentiated excitatory transmission onto PV-INs  
59 male mice. In contrast, decreased synaptic strength onto SST-INs was observed following IA  
60 ethanol in all groups of mice. Together, these findings illustrate novel sex differences in  
61 drinking-related PFC pathophysiology. Discovering means to restore PV-IN and SST-IN  
62 dysfunction following extended drinking provides opportunities for developing new treatments  
63 for all AUD patients.

64

65 **Key words**

66 alcohol, prefrontal cortex, synaptic physiology, parvalbumin, somatostatin

67

68

69 **1. Introduction**

70 Alcohol use disorder (AUD) affects all groups of people (Hasin et al., 2007), however the  
71 prevalence of alcohol abuse among women is increasing (Grant et al., 2017) and several  
72 concerning findings indicate that women are at high risk for detrimental outcomes. Women are  
73 disproportionately affected by consequences of acute intoxication (Gross and Billingham, 1998)  
74 and are particularly sensitive to peripheral diseases and cognitive disturbances stemming from  
75 chronic alcohol consumption (Nixon et al., 1995; Urbano-Marquez et al., 1995). Furthermore,  
76 the prevalence of binge drinking is increasing among women (Grucza et al., 2018) and women  
77 who develop AUD progress rapidly through disease milestones (Diehl et al., 2007; Randall et  
78 al., 1999), suggesting sex differences regulate the top-down control over drinking. These sex  
79 differences are likely mediated, in part, by the medial prefrontal cortex (PFC), a region whose  
80 dysfunction is linked with deficits in the ability to control alcohol cravings in AUD patients and  
81 animal models (Abernathy et al., 2010; George and Koob, 2010). In addition to this overall  
82 relationship, binge drinkers and AUD patients display sex differences in PFC structure (Medina  
83 et al., 2008; Squeglia et al., 2012), and women with AUD display opposite patterns of PFC  
84 activation during working memory tasks relative to men (Caldwell et al., 2005). Together, these  
85 findings provide compelling rationale for continued mechanistic research to understand sex  
86 differences in PFC pathophysiology in AUD-like disease models.

87 Preclinical studies designed to model alcohol-induced changes to PFC function have  
88 largely utilized the chronic intermittent ethanol (CIE) exposure paradigm, an animal model of  
89 dependence. Using CIE and other chronic treatment models, several labs have described  
90 dependence-related changes in PFC physiology to be generally characterized by reduced  
91 inhibition and enhanced excitatory synaptic activity (Centanni et al., 2017; Hu et al., 2015; Pava  
92 and Woodward, 2014; Pleil et al., 2015; Varodayan et al., 2018). In addition, changes in NMDA  
93 receptor function (Hu et al., 2015; Kroener et al., 2012), intrinsic properties (Hu et al., 2015),  
94 and PFC network activity (Kroener et al., 2012; Woodward and Pava, 2009), have all been

95 shown to occur as a consequence of long-term alcohol exposure and withdrawal. While the  
96 literature clearly demonstrates that PFC pathophysiology develops during dependence, deficits  
97 in PFC function are also associated with maladaptive changes in voluntary drinking (Haun et al.,  
98 2018; Klenowski et al., 2016; Radke et al., 2017b; Salling et al., 2018; Seif et al., 2013; Siciliano  
99 et al., 2019). Moreover, mounting evidence suggests that PFC interneurons may be particularly  
100 important for regulating volitional alcohol-seeking. For example, genetic disruption of synaptic  
101 transmission on forebrain interneurons, but not projection neurons, decreases drinking (Radke  
102 et al., 2017a), and early abstinence from voluntary ethanol specifically increases Fos expression  
103 in PFC interneurons (George et al., 2012). While these exciting findings suggest that PFC  
104 inhibitory microcircuits instruct drinking moderation, much remains to be learned about the  
105 specific cell types and synapses underlying these processes.

106 A major source of PFC output to the limbic system arises from deep layer pyramidal  
107 cells. While pyramidal cells comprise approximately 80% of the neurons in PFC, the remaining  
108 interneurons are essential in coordinating the output from the structure (Ferguson and Gao,  
109 2018). Deep layer PFC contains two general classes of local inhibitory interneurons that are  
110 readily divided by their form, function, and genetics. The synapses of one class appose the cell  
111 bodies of neighboring pyramidal cells, where they exert powerful feedforward inhibition to  
112 synchronize PFC network activity and output (Atallah et al., 2012; Sohal et al., 2009). These  
113 interneurons, known as “basket cells” or “chandelier cells”, have unique intrinsic properties that  
114 can be used to functionally demarcate them from regular-spiking pyramidal cells or low-  
115 threshold spiking interneurons. Using this approach, acute ethanol (Woodward and Pava, 2009)  
116 and CIE (Trantham-Davidson et al., 2014; Trantham-Davidson et al., 2017) have been shown to  
117 disrupt PFC fast-spiking interneuron function. These fast-spiking interneurons exclusively  
118 express the Ca<sup>2+</sup>-binding protein parvalbumin (PV). Transgenic mouse lines have been  
119 engineered to express fluorescent markers and manipulate protein expression under the control  
120 of the PV promoter (Taniguchi et al., 2011), enabling the means to selectively manipulate the

121 physiology of PV-expressing interneurons (PV-INs). Recent studies have leveraged these tools  
122 to reveal that GABA<sub>A</sub> receptor subunit ablation from PV-INs increases binge drinking in male  
123 mice, but not female mice, supporting the hypothesis that this interneuron subtype regulates sex  
124 differences in top-down control (Melon et al., 2018). In addition to PV-INs, the second class of  
125 deep layer PFC interneurons expresses the neuropeptide somatostatin (SST-INs). Relatively  
126 little is known about how ethanol regulates SST-IN function, partly because these neurons are  
127 more difficult to functionally separate from pyramidal cells without genetic labeling tools. In  
128 general, SST-INs project to the superficial dendrites of neighboring pyramidal cells to filter  
129 synaptic information as it flows towards the cell body. SST-INs are therefore critical for  
130 processing long-range transmission and interactions with subcortical areas (Abbas et al., 2018).  
131 In sum, PV-INs and SST-INs serve essential, complimentary functions in mediating feedforward  
132 and feedback inhibition in the PFC.

133 Female rodents exhibit higher levels of voluntary alcohol consumption than male  
134 counterparts (Becker and Lopez, 2004; Hwa et al., 2011; Jury et al., 2017; McCall et al., 2013).  
135 The behavioral findings are striking and consistent across laboratories, but the mechanisms  
136 through which PFC dysregulation contributes to this phenomenon remain unclear. Most  
137 previous studies examining PFC dysfunction were conducted in male rodents and interneurons  
138 were solely classified based on membrane properties. In addition, most studies examining PFC  
139 interneurons were performed following non-contingent exposure, leaving us with a relatively  
140 limited understanding of how PFC inhibitory microcircuits adapt following long-term volitional  
141 drinking. Based on this, we utilized transgenic fluorescent reporter mice to investigate sex  
142 differences in PFC PV-IN and SST-IN physiology in a binge drinking model. After intermittent  
143 access (IA) ethanol exposure, we observed intrinsic physiology adaptations in both PV-INs and  
144 SST-INs of male mice but not female mice. In PV-INs, IA ethanol generated diametrically  
145 opposing changes to synaptic physiology across sexes. By contrast, excitatory synaptic strength  
146 onto SST-INs was decreased in all groups of mice after IA ethanol. Collectively, these findings

147 highlight striking and contrasting adaptations to cortical interneuron synaptic physiology induced  
148 by long-term voluntary drinking.

149

## 150 **2. Material and Methods**

### 151 **2.1. Mice**

152 Mice were bred and housed in a controlled environment on a standard 12-hour light cycle (on at  
153 6:00 am). Transgenic mice expressing tdTomato fluorescent protein in PFC interneurons were  
154 generated by crossing female PV-Cre mice (Jackson Laboratories, Stock No: 017320) or SST-  
155 IRES-Cre mice (Jackson Laboratories, Stock No: 028864) with male Rosa26-loxP-STOP-loxP-  
156 CAG-tdTomato “Ai9” mice (Jackson Laboratories, Stock No: 007909). All breeding strains were  
157 congenic on a C57BL/6J genetic background. Only female PV-Cre mice were used for breeding  
158 to mitigate PV-Cre driven recombination that can occur in sperm. All breeding mice were  
159 homozygous for the respective transgene, generating heterozygous PV-tdTomato and SST-  
160 tdTomato mice suitable for experimentation. Mice were defined as female or male by their  
161 external genitalia and the current studies are limited by this definition.

162

### 163 **2.2 Intermittent access (IA) to ethanol**

164 Mice provided with IA ethanol drink more per day than continuous access controls (Hwa et al.,  
165 2011), and the C57BL/6J strain consumes more ethanol than other strains (Belknap et al., 1993;  
166 Boyce-Rustay et al., 2008; Rodgers and Mc, 1962). For these reasons, we selected the IA  
167 schedule in C57BL/6J mice as a robust rodent model of binge drinking. IA ethanol began during  
168 late adolescence (6-7 weeks). For alternating 24-hour periods, mice were provided with free  
169 access to ethanol in their home cages. Water and food were always provided *ad libitum*. Mice  
170 were individually housed 3-7 days prior to IA ethanol initiation and remained so until sacrifice.  
171 Ethanol was provided 3-4 hours prior to the dark cycle and removed one day later. For the first  
172 week of access, the concentration of ethanol was slowly ramped up (3, 6, 10%) to 20% ethanol,

173 which was used for the duration of the study. The amount of ethanol and water consumed per  
174 day was measured by weight after each drinking session. As expected, female mice drank more  
175 ethanol than matched male mice (Figure 1A and 1B). We observed no sex differences in  
176 preference for ethanol over water across the IA access procedure (Figure 1C and 1D).

177

### 178 **2.3 Electrophysiology**

179 After 3-4 weeks of 20% ethanol intake, we assessed physiological changes to PV-IN and SST-  
180 IN physiology. Mice were sacrificed 16-20 hours after the last session, a time linked to  
181 increased PFC interneuron activity (George et al., 2012). Acute prelimbic PFC slices were  
182 prepared for whole-cell patch-clamp physiology as described (Di Menna et al., 2018). In brief,  
183 mice were anesthetized with isoflurane and decapitated. Brains were rapidly removed without  
184 perfusion and submerged in *N*-methyl-D-glucamine solution. Immediately after preparation,  
185 coronal slices (300  $\mu$ M) recovered in warm (30-32 °C) *N*-methyl-D-glucamine solution for 10  
186 minutes and then in room-temperature (22-24 °C) for 1 hour in artificial cerebrospinal fluid,  
187 containing (in mM): 119 NaCl, 2.5 KCl, 2.5 CaCl<sub>2</sub>, 1.3 MgCl<sub>2</sub>, 1 NaH<sub>2</sub>PO<sub>4</sub>, 11 glucose, and 26  
188 NaHCO<sub>3</sub>. Membrane properties were assessed in current clamp configuration using a  
189 potassium-based internal solution (in mM): 125 K-gluconate, 4 NaCl, 10 HEPES, 4 MgATP, 0.3  
190 NaGTP, 10 Tris-phosphocreatine. Cells were dialyzed with internal solution for 5 minutes, after  
191 which a series of 20, 1-sec current injections were applied. Injections began at -150 pA, were  
192 incremented at 25 pA, and ended at +300 pA.  $R_m$  was calculated as the slope of the potential  
193 hyperpolarization divided by the injected current. Sag ratio was evaluated based on the resting  
194 membrane potential ( $V_m$ ) and hyperpolarization in response to -150 pA current injection. Sag  
195 ratio was calculated as the difference between the peak hyperpolarization and the steady-state,  
196 normalized to the steady-state (Joffe et al., 2019). Medium afterhyperpolarization (mAHP) was  
197 determined as the magnitude of the decrease in membrane potential during the 0.5-sec period  
198 after a current injection resulted in >20 action potentials (generally 200-300 pA for PV-INs and

199 100-200 pA for SST-INs). Cells were then switched to voltage clamp configuration, and  
200 spontaneous excitatory synaptic transmission was collected over 2 minutes. Spontaneous  
201 excitatory postsynaptic currents (sEPSCs) were detected with templates specific for each  
202 interneuron subtype. Finally, in some cells, the paired-pulse ratio (PPR) of evoked EPSCs was  
203 assessed using local electrical stimulation (5-50  $\mu$ A, 0.1 ms) of superficial layer 5 at 0.2 Hz. For  
204 each intersimulus interval (25-400 ms), 6-7 traces were averaged to determine PPR.

205

## 206 **2.4 Interneuron classification**

207 Neurons were initially selected by tdTomato fluorescence. All PV-tdTomato neurons displayed  
208 functional characteristics consistent with fast-spiking interneurons and were included in  
209 experiments. While most SST-tdTomato neurons exhibited low-threshold firing consistent with  
210 Martinotti cells, approximately one-fourth displayed irregular or fast-spiking-like properties. SST-  
211 tdTomato neurons with low  $R_m$  ( $< 150 \text{ M}\Omega$ ), hyperpolarized  $V_m$  ( $< -75 \text{ mV}$ ), and high rheobase ( $>$   
212 100 pA) were immediately discarded, as they represent ectopic tdTomato expression stemming  
213 from transient SST expression during development (Hu et al., 2013), or non-Martinotti type SST-  
214 INs (Nigro et al., 2018).

215

## 216 **2.5 Statistics**

217 The number of cells or mice is denoted by “n” and/or “N” respectively, in each figure legend.  
218 Data are generally presented as mean  $\pm$  standard error or as box plots displaying median,  
219 interquartile range, and range. Analyses were performed in GraphPad Prism. Two-tailed  
220 Student’s t-test, non-linear least squares best-fit regression, and two-way repeated-measures  
221 ANOVA with Bonferonni post-hoc comparisons were used as appropriate. All statistical findings  
222 are displayed in the figure legends.

223

## 224 **3. Results**



225 **3.1 Basal physiology of PFC PV-INs in female mice and male mice**

226 To assess whether PFC fast-spiking interneurons display sex differences in intrinsic and  
227 synaptic physiology, we generated mice expressing tdTomato in PV-expressing neurons (Figure  
228 2A and 2B). Using whole-cell patch-clamp techniques we validated that PV(+) cells represent  
229 fast-spiking interneurons in layer 5 prelimbic PFC. Indeed, PV(+) cells display the hallmark  
230 characteristics of fast-spiking interneurons (Connors and Gutnick, 1990; Kawaguchi, 1993;  
231 Markram et al., 2004; McCormick et al., 1985), including high firing frequency and minimal  
232 spike-firing adaptation and hyperpolarization sag (Figure 2B-2F). PV-IN intrinsic properties were  
233 comparable between female and male mice, however PV-INs from male mice exhibited a  
234 smaller medium afterhyperpolarization (mAHP) than those from female mice (Figure 2G).  
235 Measurements of basal excitatory synaptic strength were also similar across sexes (Figure 2H  
236 and 2I), but the variance of PV-IN sEPSC frequency was greater in female mice (Figure 2I).

237

238 **3.2 Basal physiology of PFC SST-INs in female mice and male mice**

239 To assess the intrinsic and synaptic physiology of PFC low-threshold spiking interneurons, we  
240 generated mice expressing tdTomato under control of the SST promotor (Figure 3A and 3B). In  
241 layer 5 PFC, most SST(+) cells represent low-threshold spiking interneurons, however some  
242 neurons displayed fast-spiking-like phenotypes and were immediately relinquished. Low-  
243 threshold spiking SST(+) cells display several characteristics of Martinotti cells (Nigro et al.,  
244 2018; Tremblay et al., 2016) including high  $R_m$ , depolarized  $V_m$ , low rheobase, and firing upon  
245 rebound from hyperpolarization (Figure 3B). SST-IN intrinsic properties and measurements of  
246 basal synaptic physiology were all comparable across sexes (Figure 3C-3I).

247

248 **3.3 Adaptations to PV-IN and SST-IN membrane physiology in male, but not female, mice**  
249 **following IA ethanol**

250 Across most rodent strains, females voluntarily consume more ethanol than males. This

251 phenotype has been observed across many laboratories (Becker and Lopez, 2004; Hwa et al.,  
252 2011; Jury et al., 2017; McCall et al., 2013; Priddy et al., 2017), but the etiology underlying the  
253 sex difference remains incompletely understood. To model high levels of volitional alcohol  
254 drinking, we implemented an intermittent access (IA) schedule, where mice were provided with  
255 alternating days of ethanol availability in their home cages. Female mice drank more than males  
256 (Figure 1), and we then assessed intrinsic properties of PFC PV-INs and SST-INs at one-day  
257 abstinence from IA ethanol. We observed minimal effects of IA ethanol treatment on passive  
258 membrane properties or hyperpolarization sag in either interneuron subtype in either sex (Figure  
259 S1). Furthermore, we observed little effect of IA ethanol exposure on PV-IN active membrane  
260 properties in female mice (Figure 4A and 4B). In contrast, PV-INs from IA ethanol male mice  
261 exhibited distinct adaptations surrounding action potential initiation. Across multiple current  
262 injections, we observed increased current-evoked firing in PV-INs from male mice (Figure 4C).  
263 Following trains of action potentials, many neuron types display mAHP, a brief (~100-ms to 2-  
264 sec) hyperpolarization. mAHP is generally mediated by voltage- and/or calcium-gated  
265 potassium channels and serves a feedback mechanism to limit continuous neural activity. PV-  
266 INs from male IA ethanol mice displayed greater mAHP than matched controls (Figure 4C).  
267 Together, these data indicate that PV-INs from male mice are hyperexcitable following IA  
268 ethanol and susceptible to enhanced feedback to limit their ongoing activity. We next examined  
269 membrane physiology of SST-INs. Like the PV-INs, SST-INs from female IA ethanol mice  
270 displayed similar current-evoked firing and mAHP to controls (Figure 4E and 4F). Unlike PV-INs,  
271 SST-IN spike-firing was no different between control and IA ethanol male mice (Figure 4G), but  
272 SST-INs from male IA ethanol mice did display enhanced mAHP (Figure 4H). Importantly,  
273 however, the large mAHP in male IA ethanol SST-INs might stem from a non-specific increase  
274 in  $R_m$  (Figure S1K) and therefore may not reflect a specific change to calcium-activated  
275 potassium channels. Overall, these intrinsic physiology adaptations suggest that IA ethanol  
276 alters the processes through which interneurons respond to synaptic input and alter PFC

277 microcircuit function. We therefore aimed to better understand how binge drinking might modify  
278 excitatory input onto PFC PV-INs and SST-INs and investigated synaptic properties from  
279 controls and IA ethanol-exposed mice.

280

### 281 **3.4 Opposing changes to synaptic strength onto PFC PV-INs after IA ethanol in female** 282 **and male mice**

283 PFC interneurons generally display low levels of basal activity *in vivo*. Instead, long-range  
284 excitatory afferents dynamically recruit PV-IN and SST-IN activity to shape local networks of  
285 PFC pyramidal cells through feedforward and feedback inhibition. Thus, assessing how IA  
286 ethanol alters the synaptic strength of excitatory synapses onto PFC interneurons is essential to  
287 place the observed membrane physiology changes within a holistic context. We first analyzed  
288 the amplitude and frequency of sEPSCs to assess quantal size and content of glutamate  
289 synapses onto PV-INs (Figure 5A). In female mice, we observed a decrease in both sEPSC  
290 amplitude (Figure 5B) and frequency (Figure 5C) between IA ethanol treatment and controls.  
291 These data suggest PV-INs in female mice display reduced AMPA receptor function and fewer  
292 detectable synapses after IA ethanol exposure. We next used electrical stimulation to evaluate  
293 the paired-pulse ratio (PPR), which is modulated by changes in neurotransmitter release  
294 probability. We observed no difference in PPR (Figure 5D), suggesting changes in presynaptic  
295 glutamate release do not play a major role in the adaptations following IA ethanol. In PV-INs of  
296 female mice, the overall changes are most consistent with attenuated postsynaptic AMPA  
297 receptor function and fewer detectable synapses. Opposing results were obtained in PV-INs  
298 from male mice. IA ethanol increased both sEPSC amplitude (Figure 5E and 5F) and frequency  
299 (Figure 5E and 5G) without affecting PPR (Figure 5H), suggesting enhanced function of  
300 postsynaptic AMPA receptors and an increase in the number of detectable excitatory synapses  
301 after IA ethanol exposure. While we observed likely postsynaptic changes in both groups, these  
302 striking findings indicate that the excitatory synapses onto PFC PV-INs undergo diametrically

303 opposed changes in female and male mice. These synaptic adaptations are expected to  
304 attenuate and facilitate PV-IN recruitment by excitatory drive in female and male mice with a  
305 history of IA ethanol respectively.

306

### 307 **3.5 Diminished synaptic strength onto PFC SST-INs after IA ethanol**

308 As with PV-INs, we evaluated changes to excitatory synaptic transmission onto SST-INs in  
309 control mice and those exposed to IA ethanol. In female mice, one-day abstinence from IA  
310 ethanol was associated with decreased excitatory synaptic strength (Figure 6A), as evidenced  
311 by reductions in both sEPSC amplitude (Figure 6B) and frequency (Figure 6C). The PPR of  
312 evoked EPSCs was not different between the control and IA ethanol groups, suggesting these  
313 changes in excitatory transmission occurred through postsynaptic reduction in AMPA receptor  
314 function and the number of detectable synapses. We observed similar changes in male mice  
315 (Figure 6E). IA ethanol produced an attenuation of sEPSC amplitude (Figure 6F) and frequency  
316 (Figure 6G) in SST-INs of male mice. Surprisingly, we observed decreased PPR across multiple  
317 interstimulus intervals in these cells from the IA ethanol group (Figure 6H). At face value, these  
318 data suggest increased presynaptic glutamate release probability and are not consistent with  
319 the concomitant reduction in sEPSC frequency. We offer two potential explanations for this  
320 discrepancy: (1) distinct sets of synapses may have been sampled during spontaneous and  
321 evoked EPSC recordings, as has been observed at excitatory synapses onto other cell types in  
322 the central nervous system (Ramirez and Kavalali, 2011); and (2) SST-IN PPR may be  
323 regulated by a postsynaptic feature, such as the activity-dependent polyamine sensitivity of  
324 AMPA receptors previously observed in cortical interneurons (Rozov and Burnashev, 1999).  
325 Nonetheless, the collective dataset suggests that IA ethanol exposure attenuates excitatory  
326 transmission overall onto SST-INs in all groups of mice.

327

328

329 **4. Discussion**

330 The PFC is essential for top-down moderation of drinking (Abernathy et al., 2010;  
331 George and Koob, 2010). The preclinical literature has primarily focused on how ethanol alters  
332 the function of PFC pyramidal cells, the principal neurons that convey information from the PFC  
333 to subcortical structures. Nonetheless, PFC output is dynamically regulated by local  
334 interneurons, so we sought to investigate physiological adaptations occurring on those discrete  
335 cell types following ethanol exposure. We functionally interrogated two genetically defined  
336 subtypes of PFC interneurons in a binge drinking model. IA ethanol induced disparate sex-  
337 dependent adaptations to PV-INs – fewer detectable synapses in female mice and enhanced  
338 postsynaptic AMPA receptor function in male mice. In contrast, IA ethanol dampened excitatory  
339 synaptic strength onto SST-INs in all groups of mice. Together, these data indicate that altered  
340 excitatory synaptic drive onto PV-INs and SST-INs may contribute to PFC dysfunction in AUD.

341 The changes we observed to PV-IN and SST-IN intrinsic and synaptic physiology may or  
342 may not be related. While we observed a significant increase in mAHP following IA ethanol in  
343 interneurons from male mice, a potential increase may have been occluded in PV-INs from  
344 female mice due to their relatively large basal mAHP. Following sustained depolarization, the  
345 mAHP limits neural activity and calcium mobilization within a postsynaptic cell. Therefore, the  
346 coincidental ethanol-induced increases in PV-IN mAHP and synaptic strength in male mice are  
347 consistent with a homeostatic response, i.e. increased mAHP might provide a feedback  
348 mechanism to mitigate excessive activation of PV-INs following synaptic stimulation. In PV-INs  
349 from female mice and SST-INs, by contrast, an IA ethanol-induced increase in mAHP might  
350 have facilitated spike timing-dependent long-term depression (Lu et al., 2007), thereby initiating  
351 an ethanol-induced reduction synaptic strength. In addition – or as an alternative – to these  
352 potential causal relationships, the coincidental changes to mAHP and synaptic strength might  
353 be manifested by the further separation of PV-INs into responsive and non-responsive  
354 subpopulations. PV-INs can be divided into “basket cells” and “chandelier cells” based on the

355 subcellular targeting of their axons. Chandelier cells exhibit minimal mAHP relative to basket  
356 cells (Povysheva et al., 2013), thus one intriguing hypothesis is that IA ethanol specifically  
357 enhances mAHP (and also modulates synaptic strength) in this PV-IN subtype. Similarly,  
358 cortical SST-INs can be further stratified into subclasses based on intrinsic properties,  
359 connectivity, and protein expression (Tremblay et al., 2016), and some of these factors may  
360 confer susceptibility to alcohol-related pathophysiology.

361 Female mice drink more ethanol than male counterparts. While that could conceivably  
362 contribute to differences in our observed physiological changes, we find it unlikely that relatively  
363 modest variation in ethanol exposure initiates fundamentally distinct changes in physiology.  
364 With that in mind, the current findings reveal that PFC PV-INs undergo entirely distinct  
365 adaptations based on sex, particularly with regards to synaptic physiology. These results beg  
366 the question, do ethanol-induced adaptations to PV-INs contribute to sex differences in drinking  
367 behaviors? Substantial further research is needed to address this question. For one, it remains  
368 unclear how PFC PV-IN activity *in vivo* modulates drinking and other appetitive behaviors.  
369 Experiments designed to monitor and manipulate PV-IN activity during a variety of components  
370 of ethanol-seeking tasks will be important to fully understand how molecular changes to PV-IN  
371 physiology confer AUD-like adaptations. One overly simple and wildly speculative prediction is  
372 that feedforward drive onto PV-INs inhibits cortical circuits involved in drinking behaviors, such  
373 as the PFC projections to the nucleus accumbens (Seif et al., 2013) or periaqueductal gray  
374 (Siciliano et al., 2019). Were that the case, decreased excitatory transmission onto PV-INs  
375 could facilitate drinking in female mice and enhanced drive onto PV-INs in male mice might  
376 confer some resilience. Similarly, attenuated drive onto SST-INs might promote drinking in all  
377 groups of mice, but the discrepant changes to PPR and sEPSC frequency in male SST-INs  
378 highlight the need to investigate specific sources of glutamate onto PFC interneurons. In  
379 addition to providing top-down control over drinking, the PFC regulates a variety of cognitive  
380 processes with relevance for AUD. In particular, working memory and cognitive flexibility are

381 regulated by PFC PV-INs (Murray et al., 2015) and SST-INs (Abbas et al., 2018). Based on this,  
382 we predict that interneuron dysfunction likely contributes to impairments in PFC-dependent  
383 cognitive processes observed in animal models of AUD (George et al., 2012; Salling et al.,  
384 2018; Trantham-Davidson et al., 2014; Vargas et al., 2014). Further research, however, is  
385 needed to test this hypothesis and to examine potential sex differences in AUD-related cognitive  
386 disruptions.

387         The preclinical literature modeling PFC dysfunction has generally utilized male subjects  
388 and focused on adaptations to pyramidal cells. Studies describing PFC interneuron dysfunction  
389 have been more limited and exclusively examined the physiological ramifications of ethanol  
390 dependence or chronic intoxication. Trantham-Davidson et al. (Trantham-Davidson et al., 2014)  
391 assessed intrinsic properties of functionally identified fast-spiking interneurons (putative PV-INs)  
392 in male rats exposed to CIE. CIE generated differences in dopamine modulation of fast-spiking  
393 interneuron current-evoked firing, but baseline excitability parameters, including input-output  
394 firing curves and mAHP, were not reported. Another recent paper by Hughes et al. (Hughes et  
395 al., 2019) described several changes to the intrinsic properties of PFC interneurons in a rat  
396 model of chronic intoxication. Following ethanol exposure, Hughes et al. observed decreased  
397 fast-spiking interneuron excitability in all rats, while we detected *increased* PV-IN spiking in male  
398 mice only. Further, Hughes et al. observed ethanol-induced sex differences in current-evoked  
399 firing in putative Martinotti cells, while we noted minimal effects on SST-IN intrinsic physiology in  
400 either female mice or male mice. Several major technical differences are likely to explain these  
401 discrepancies. Hughes et al. delivered an intoxicating dose of ethanol (~250 mg/dL) to rats on  
402 successive days, whereas mice in the current studies voluntarily drank on alternating nights to  
403 reach moderate blood ethanol concentrations (~80 mg/dL reported in previous studies (Hwa et  
404 al., 2011; Salling et al., 2018)). In addition to methodological differences in slice preparation and  
405 interneuron classification, differences between the two studies might stem from means of  
406 ethanol delivery, overall intake, pattern of intake, and species. Each of these parameters merits

407 further examination. We believe the diversity of preclinical AUD models is a beneficial feature of  
408 the research community; continued research across several models will help elucidate the core  
409 features of disease etiology. To our knowledge, the present study represents the first  
410 characterization of PFC interneuron synaptic physiology following voluntary drinking, although  
411 these findings are also limited by a single timepoint. Future studies should be designed to  
412 address the development and recovery of PFC interneuron pathophysiology and related  
413 behavioral adaptations across multiple disease models.

414         Based on the current findings, one would expect for inhibitory transmission onto PFC  
415 pyramidal cells to be altered following chronic drinking and in models of alcohol dependence. In  
416 ostensible contrast to that hypothesis, previous research did not reveal differences in inhibitory  
417 transmission onto deep layer prelimbic PFC pyramidal cells during acute withdrawal from CIE  
418 (Pleil et al., 2015; Trantham-Davidson et al., 2014). During those experiments, however,  
419 GABAergic inhibitory postsynaptic currents (IPSCs) on pyramidal cells were collected with non-  
420 specific electrical stimulation or in a spontaneous manner. The present findings suggest that  
421 output from each interneuron subpopulation is likely altered following ethanol exposure, but  
422 coincidental adaptations might have obfuscated changes in non-specific IPSCs in previous  
423 work. Our findings suggest this possibility is particularly likely for male subjects, as we observed  
424 contrasting changes to synaptic strength onto PV-INs and SST-INs in male mice. Consistent  
425 with this hypothesis, Trantham-Davidson et al (Trantham-Davidson et al., 2014). discovered that  
426 CIE disrupted the ability of D4 dopamine receptors to modulate IPSCs recorded from pyramidal  
427 cells. D4 receptors regulate PV-IN function in the PFC (Zhong and Yan, 2016) and  
428 hippocampus (Andersson et al., 2012) without affecting other types of interneurons, suggesting  
429 that PV-INs mediated the CIE-induced changes to D4 signaling observed by Trantham-  
430 Davidson et al (2014). Future investigations targeting PFC inhibitory synapses with interneuron  
431 type-specific manipulations, in both female and male rodents, should improve our understanding  
432 of how alcohol exposure dysregulates PFC function and assist efforts to discover novel targets



433 for the treatment of AUD.

434 Restoring normal synaptic physiology on PFC PV-INs and SST-INs following IA ethanol  
435 may provide avenues to mitigating behavioral disruptions relevant to AUD. A better  
436 understanding of the mechanisms regulating synaptic plasticity on cortical interneurons would  
437 be essential towards these endeavors. Calcium-permeable AMPA receptors and NMDA  
438 receptors represent two candidate molecules that might modulate synaptic strength onto PV-INs  
439 and SST-INs during or after IA ethanol. Future studies should therefore examine drinking-  
440 related changes in AMPA and NMDA receptor expression, stoichiometry, and signaling on  
441 cortical interneurons. In addition to ionotropic glutamate receptors, changes in fast glutamate  
442 transmission are often mediated by metabotropic glutamate (mGlu) receptors. Several previous  
443 findings suggest mGlu receptors may be involved in the PFC interneuron synaptic  
444 pathophysiology we observed after IA ethanol. Transcript and protein for mGlu receptor  
445 subtypes 1 (mGlu<sub>1</sub>) and 5 (mGlu<sub>5</sub>) are enriched in interneurons, and mGlu<sub>1</sub> and mGlu<sub>5</sub> have  
446 been implicated in forms of long-term potentiation specific to interneurons (Le Duigou and  
447 Kullmann, 2011; Perez et al., 2001). Furthermore, mGlu<sub>5</sub>, but not mGlu<sub>1</sub>, gates long-term  
448 potentiation onto fast-spiking interneurons in the visual cortex (Sarihi et al., 2008), but these  
449 plasticity mechanisms have not, to our knowledge, been investigated in the PFC or other  
450 associative cortices. In addition to these plasticity mechanisms, pronounced sex differences in  
451 mGlu<sub>1</sub> and mGlu<sub>5</sub> signaling have been observed in the limbic system: estradiol regulates  
452 hippocampal inhibitory transmission through mGlu<sub>1</sub> (Huang and Woolley, 2012), and sex  
453 hormones modulate mGlu<sub>5</sub>-dependent synaptic plasticity in the nucleus accumbens (Gross et  
454 al., 2018; Peterson et al., 2015). Altogether, the breadth of preclinical literature raises the  
455 possibility that changes in PFC glutamate transmission during IA ethanol might recruit  
456 mGlu<sub>1</sub>/mGlu<sub>5</sub> signaling to modulate synaptic strength on PV-INs and SST-INs in a sex-  
457 dependent manner. Consistent with that hypothesis, mice harboring mGlu<sub>5</sub> ablation from PV-  
458 expressing neurons display altered sensitivity to rewarding drugs and a sex-dependent increase

459 in habitual behavior (Barnes et al., 2015). Finally, small molecule modulators of mGlu<sub>1</sub> and  
460 mGlu<sub>5</sub> are efficacious in multiple preclinical AUD models (Joffe et al., 2018), providing further  
461 impetus for investigating how these signaling pathways may underlie disease etiology.

462

## 463 **5. Conclusion**

464 Interneurons arise from distinct progenitors and express distinct transcriptional program,  
465 presenting opportunities to leverage biological idiosyncrasies for the targeted treatment of  
466 disease. Efficacious AUD treatments might one day be developed from cortical interneuron  
467 dysfunction initially observed in a preclinical disease model. The striking adaptations to synaptic  
468 physiology described here provide one potential starting place.

469

470

471 **Acknowledgements**

472 The authors thank members of the Conn and Winder labs for stimulating discussions. This work  
473 was supported by National Institutes of Health grants R01MH062646 and R37NS031373 (P.J.C.).  
474 M.E.J. was supported by a postdoctoral fellowship through the Pharmaceutical Research and  
475 Manufacturers of America Foundation.

476

477 **Author Contributions**

478 Conceptualization, M.E.J.; Investigation, M.E.J.; Supervision, D.G.W. and P.J.C.; Writing –  
479 Original Draft, M.E.J.; Writing – Review & Editing – all authors; Funding Acquisition, M.E.J. and  
480 P.J.C.

481

482 **Declaration of interests**

483 P.J.C. receives research support from Lundbeck Pharmaceuticals and Boehringer Ingelheim  
484 P.J.C. is an inventor on multiple patents for allosteric modulators of metabotropic glutamate  
485 receptors. M.E.J. and D.G.W. declare no potential conflicts of interest.

486

487 **References**

- 488 Abbas, A. I., Sundiang, M. J. M., Henoch, B., Morton, M. P., Bolkan, S. S., Park, A. J., Harris, A.  
489 Z., Kellendonk, C., Gordon, J. A., 2018. Somatostatin Interneurons Facilitate Hippocampal-  
490 Prefrontal Synchrony and Prefrontal Spatial Encoding. *Neuron* 100, 926-939 e923.
- 491 Abernathy, K., Chandler, L. J., Woodward, J. J., 2010. Alcohol and the prefrontal cortex. *Int Rev*  
492 *Neurobiol* 91, 289-320.
- 493 Andersson, R., Johnston, A., Fisahn, A., 2012. Dopamine D4 receptor activation increases  
494 hippocampal gamma oscillations by enhancing synchronization of fast-spiking interneurons.  
495 *PLoS One* 7, e40906.
- 496 Atallah, B. V., Bruns, W., Carandini, M., Scanziani, M., 2012. Parvalbumin-expressing  
497 interneurons linearly transform cortical responses to visual stimuli. *Neuron* 73, 159-170.
- 498 Barnes, S. A., Pinto-Duarte, A., Kappe, A., Zembrzycki, A., Metzler, A., Mukamel, E. A., Lucero,  
499 J., Wang, X., Sejnowski, T. J., Markou, A., Behrens, M. M., 2015. Disruption of mGluR5 in  
500 parvalbumin-positive interneurons induces core features of neurodevelopmental disorders. *Mol*  
501 *Psychiatry* 20, 1161-1172.
- 502 Becker, H. C., Lopez, M. F., 2004. Increased ethanol drinking after repeated chronic ethanol  
503 exposure and withdrawal experience in C57BL/6 mice. *Alcohol Clin Exp Res* 28, 1829-1838.
- 504 Belknap, J. K., Crabbe, J. C., Young, E. R., 1993. Voluntary consumption of ethanol in 15 inbred  
505 mouse strains. *Psychopharmacology (Berl)* 112, 503-510.
- 506 Boyce-Rustay, J. M., Janos, A. L., Holmes, A., 2008. Effects of chronic swim stress on EtOH-  
507 related behaviors in C57BL/6J, DBA/2J and BALB/cByJ mice. *Behav Brain Res* 186, 133-137.
- 508 Caldwell, L. C., Schweinsburg, A. D., Nagel, B. J., Barlett, V. C., Brown, S. A., Tapert, S. F., 2005.  
509 Gender and adolescent alcohol use disorders on BOLD (blood oxygen level dependent) response  
510 to spatial working memory. *Alcohol Alcohol* 40, 194-200.
- 511 Centanni, S. W., Burnett, E. J., Trantham-Davidson, H., Chandler, L. J., 2017. Loss of delta-  
512 GABAA receptor-mediated tonic currents in the adult prelimbic cortex following adolescent alcohol  
513 exposure. *Addict Biol* 22, 616-628.
- 514 Connors, B. W., Gutnick, M. J., 1990. Intrinsic firing patterns of diverse neocortical neurons.  
515 *Trends Neurosci* 13, 99-104.
- 516 Di Menna, L., Joffe, M. E., Iacovelli, L., Orlando, R., Lindsley, C. W., Mairesse, J., Gressens, P.,  
517 Cannella, M., Caraci, F., Copani, A., Bruno, V., Battaglia, G., Conn, P. J., Nicoletti, F., 2018.  
518 Functional partnership between mGlu3 and mGlu5 metabotropic glutamate receptors in the  
519 central nervous system. *Neuropharmacology* 128, 301-313.

- 520 Diehl, A., Croissant, B., Batra, A., Mundle, G., Nakovics, H., Mann, K., 2007. Alcoholism in  
521 women: is it different in onset and outcome compared to men? *Eur Arch Psychiatry Clin Neurosci*  
522 257, 344-351.
- 523 Ferguson, B. R., Gao, W. J., 2018. PV Interneurons: Critical Regulators of E/I Balance for  
524 Prefrontal Cortex-Dependent Behavior and Psychiatric Disorders. *Front Neural Circuits* 12, 37.
- 525 George, O., Koob, G. F., 2010. Individual differences in prefrontal cortex function and the  
526 transition from drug use to drug dependence. *Neurosci Biobehav Rev* 35, 232-247.
- 527 George, O., Sanders, C., Freiling, J., Grigoryan, E., Vu, S., Allen, C. D., Crawford, E., Mandyam,  
528 C. D., Koob, G. F., 2012. Recruitment of medial prefrontal cortex neurons during alcohol  
529 withdrawal predicts cognitive impairment and excessive alcohol drinking. *Proc Natl Acad Sci U S*  
530 *A* 109, 18156-18161.
- 531 Grant, B. F., Chou, S. P., Saha, T. D., Pickering, R. P., Kerridge, B. T., Ruan, W. J., Huang, B.,  
532 Jung, J., Zhang, H., Fan, A., Hasin, D. S., 2017. Prevalence of 12-Month Alcohol Use, High-Risk  
533 Drinking, and DSM-IV Alcohol Use Disorder in the United States, 2001-2002 to 2012-2013:  
534 Results From the National Epidemiologic Survey on Alcohol and Related Conditions. *JAMA*  
535 *Psychiatry* 74, 911-923.
- 536 Gross, K. S., Moore, K. M., Meisel, R. L., Mermelstein, P. G., 2018. mGluR5 Mediates  
537 Dihydrotestosterone-Induced Nucleus Accumbens Structural Plasticity, but Not Conditioned  
538 Reward. *Front Neurosci* 12, 855.
- 539 Gross, W. C., Billingham, R. E., 1998. Alcohol consumption and sexual victimization among  
540 college women. *Psychol Rep* 82, 80-82.
- 541 Grucza, R. A., Sher, K. J., Kerr, W. C., Krauss, M. J., Lui, C. K., McDowell, Y. E., Hartz, S., Viridi,  
542 G., Bierut, L. J., 2018. Trends in Adult Alcohol Use and Binge Drinking in the Early 21st-Century  
543 United States: A Meta-Analysis of 6 National Survey Series. *Alcohol Clin Exp Res* 42, 1939-1950.
- 544 Hasin, D. S., Stinson, F. S., Ogburn, E., Grant, B. F., 2007. Prevalence, correlates, disability, and  
545 comorbidity of DSM-IV alcohol abuse and dependence in the United States: results from the  
546 National Epidemiologic Survey on Alcohol and Related Conditions. *Arch Gen Psychiatry* 64, 830-  
547 842.
- 548 Haun, H. L., Griffin, W. C., Lopez, M. F., Solomon, M. G., Mulholland, P. J., Woodward, J. J.,  
549 McGinty, J. F., Ron, D., Becker, H. C., 2018. Increasing Brain-Derived Neurotrophic Factor  
550 (BDNF) in medial prefrontal cortex selectively reduces excessive drinking in ethanol dependent  
551 mice. *Neuropharmacology* 140, 35-42.
- 552 Hu, H., Cavendish, J. Z., Agmon, A., 2013. Not all that glitters is gold: off-target recombination in  
553 the somatostatin-IRES-Cre mouse line labels a subset of fast-spiking interneurons. *Front Neural*  
554 *Circuits* 7, 195.

- 555 Hu, W., Morris, B., Carrasco, A., Kroener, S., 2015. Effects ofacamprosate on attentional set-  
556 shifting and cellular function in the prefrontal cortex of chronic alcohol-exposed mice. *Alcohol Clin*  
557 *Exp Res* 39, 953-961.
- 558 Huang, G. Z., Woolley, C. S., 2012. Estradiol acutely suppresses inhibition in the hippocampus  
559 through a sex-specific endocannabinoid and mGluR-dependent mechanism. *Neuron* 74, 801-808.
- 560 Hughes, B. A., Crofton, E. J., O'Buckley, T. K., Herman, M. A., Morrow, A. L., 2019. Chronic  
561 ethanol exposure alters prelimbic prefrontal cortical Fast-Spiking and Martinotti interneuron  
562 function with differential sex specificity in rat brain. *Neuropharmacology* 162, 107805.
- 563 Hwa, L. S., Chu, A., Levinson, S. A., Kayyali, T. M., DeBold, J. F., Miczek, K. A., 2011. Persistent  
564 escalation of alcohol drinking in C57BL/6J mice with intermittent access to 20% ethanol. *Alcohol*  
565 *Clin Exp Res* 35, 1938-1947.
- 566 Joffe, M. E., Centanni, S. W., Jaramillo, A. A., Winder, D. G., Conn, P. J., 2018. Metabotropic  
567 Glutamate Receptors in Alcohol Use Disorder: Physiology, Plasticity, and Promising  
568 Pharmacotherapies. *ACS Chem Neurosci*.
- 569 Joffe, M. E., Santiago, C. I., Oliver, K. H., Maksymetz, J., Harris, N. A., Engers, J. L., Lindsley, C.  
570 W., Winder, D. G., Conn, P. J., 2019. mGlu2 and mGlu3 Negative Allosteric Modulators  
571 Divergently Enhance Thalamocortical Transmission and Exert Rapid Antidepressant-like Effects.  
572 *Neuron*.
- 573 Jury, N. J., DiBerto, J. F., Kash, T. L., Holmes, A., 2017. Sex differences in the behavioral  
574 sequelae of chronic ethanol exposure. *Alcohol* 58, 53-60.
- 575 Kawaguchi, Y., 1993. Groupings of nonpyramidal and pyramidal cells with specific physiological  
576 and morphological characteristics in rat frontal cortex. *J Neurophysiol* 69, 416-431.
- 577 Klenowski, P. M., Fogarty, M. J., Shariff, M., Belmer, A., Bellingham, M. C., Bartlett, S. E., 2016.  
578 Increased Synaptic Excitation and Abnormal Dendritic Structure of Prefrontal Cortex Layer V  
579 Pyramidal Neurons following Prolonged Binge-Like Consumption of Ethanol. *eNeuro* 3.
- 580 Kroener, S., Mulholland, P. J., New, N. N., Gass, J. T., Becker, H. C., Chandler, L. J., 2012.  
581 Chronic alcohol exposure alters behavioral and synaptic plasticity of the rodent prefrontal cortex.  
582 *PLoS One* 7, e37541.
- 583 Le Duigou, C., Kullmann, D. M., 2011. Group I mGluR agonist-evoked long-term potentiation in  
584 hippocampal oriens interneurons. *J Neurosci* 31, 5777-5781.
- 585 Lu, J. T., Li, C. Y., Zhao, J. P., Poo, M. M., Zhang, X. H., 2007. Spike-timing-dependent plasticity  
586 of neocortical excitatory synapses on inhibitory interneurons depends on target cell type. *J*  
587 *Neurosci* 27, 9711-9720.

- 588 Markram, H., Toledo-Rodriguez, M., Wang, Y., Gupta, A., Silberberg, G., Wu, C., 2004.  
589 Interneurons of the neocortical inhibitory system. *Nat Rev Neurosci* 5, 793-807.
- 590 McCall, N. M., Sprow, G. M., Delpire, E., Thiele, T. E., Kash, T. L., Pleil, K. E., 2013. Effects of  
591 sex and deletion of neuropeptide Y2 receptors from GABAergic neurons on affective and alcohol  
592 drinking behaviors in mice. *Front Integr Neurosci* 7, 100.
- 593 McCormick, D. A., Connors, B. W., Lighthall, J. W., Prince, D. A., 1985. Comparative  
594 electrophysiology of pyramidal and sparsely spiny stellate neurons of the neocortex. *J*  
595 *Neurophysiol* 54, 782-806.
- 596 Medina, K. L., McQueeney, T., Nagel, B. J., Hanson, K. L., Schweinsburg, A. D., Tapert, S. F.,  
597 2008. Prefrontal cortex volumes in adolescents with alcohol use disorders: unique gender effects.  
598 *Alcohol Clin Exp Res* 32, 386-394.
- 599 Melon, L. C., Nasman, J. T., John, A. S., Mbonu, K., Maguire, J. L., 2018. Interneuronal delta-  
600 GABAA receptors regulate binge drinking and are necessary for the behavioral effects of early  
601 withdrawal. *Neuropsychopharmacology*.
- 602 Murray, A. J., Woloszynowska-Fraser, M. U., Ansel-Bollepalli, L., Cole, K. L., Foggetti, A., Crouch,  
603 B., Riedel, G., Wulff, P., 2015. Parvalbumin-positive interneurons of the prefrontal cortex support  
604 working memory and cognitive flexibility. *Sci Rep* 5, 16778.
- 605 Nigro, M. J., Hashikawa-Yamasaki, Y., Rudy, B., 2018. Diversity and Connectivity of Layer 5  
606 Somatostatin-Expressing Interneurons in the Mouse Barrel Cortex. *J Neurosci* 38, 1622-1633.
- 607 Nixon, S. J., Tivis, R., Parsons, O. A., 1995. Behavioral dysfunction and cognitive efficiency in  
608 male and female alcoholics. *Alcohol Clin Exp Res* 19, 577-581.
- 609 Pava, M. J., Woodward, J. J., 2014. Chronic ethanol alters network activity and endocannabinoid  
610 signaling in the prefrontal cortex. *Front Integr Neurosci* 8, 58.
- 611 Perez, Y., Morin, F., Lacaille, J. C., 2001. A hebbian form of long-term potentiation dependent on  
612 mGluR1a in hippocampal inhibitory interneurons. *Proc Natl Acad Sci U S A* 98, 9401-9406.
- 613 Peterson, B. M., Mermelstein, P. G., Meisel, R. L., 2015. Estradiol mediates dendritic spine  
614 plasticity in the nucleus accumbens core through activation of mGluR5. *Brain Struct Funct* 220,  
615 2415-2422.
- 616 Pleil, K. E., Lowery-Gionta, E. G., Crowley, N. A., Li, C., Marcinkiewicz, C. A., Rose, J. H., McCall,  
617 N. M., Maldonado-Devicci, A. M., Morrow, A. L., Jones, S. R., Kash, T. L., 2015. Effects of  
618 chronic ethanol exposure on neuronal function in the prefrontal cortex and extended amygdala.  
619 *Neuropharmacology* 99, 735-749.
- 620 Povysheva, N. V., Zaitsev, A. V., Gonzalez-Burgos, G., Lewis, D. A., 2013. Electrophysiological  
621 heterogeneity of fast-spiking interneurons: chandelier versus basket cells. *PLoS One* 8, e70553.

- 622 Priddy, B. M., Carmack, S. A., Thomas, L. C., Vendruscolo, J. C., Koob, G. F., Vendruscolo, L.  
623 F., 2017. Sex, strain, and estrous cycle influences on alcohol drinking in rats. *Pharmacol Biochem*  
624 *Behav* 152, 61-67.
- 625 Radke, A. K., Jury, N. J., Delpire, E., Nakazawa, K., Holmes, A., 2017a. Reduced ethanol drinking  
626 following selective cortical interneuron deletion of the GluN2B NMDA receptors subunit. *Alcohol*  
627 58, 47-51.
- 628 Radke, A. K., Jury, N. J., Kocharian, A., Marcinkiewicz, C. A., Lowery-Gionta, E. G., Pleil, K. E.,  
629 McElligott, Z. A., McKlveen, J. M., Kash, T. L., Holmes, A., 2017b. Chronic EtOH effects on  
630 putative measures of compulsive behavior in mice. *Addict Biol* 22, 423-434.
- 631 Ramirez, D. M., Kavalali, E. T., 2011. Differential regulation of spontaneous and evoked  
632 neurotransmitter release at central synapses. *Curr Opin Neurobiol* 21, 275-282.
- 633 Randall, C. L., Roberts, J. S., Del Boca, F. K., Carroll, K. M., Connors, G. J., Mattson, M. E., 1999.  
634 Telescoping of landmark events associated with drinking: a gender comparison. *J Stud Alcohol*  
635 60, 252-260.
- 636 Rodgers, D. A., Mc, C. G., 1962. Mouse strain differences in preference for various concentrations  
637 of alcohol. *Q J Stud Alcohol* 23, 26-33.
- 638 Rozov, A., Burnashev, N., 1999. Polyamine-dependent facilitation of postsynaptic AMPA  
639 receptors counteracts paired-pulse depression. *Nature* 401, 594-598.
- 640 Salling, M. C., Jane Skelly, M., Avegno, E., Regan, S., Zeric, T., Nichols, E., Harrison, N. L., 2018.  
641 Alcohol consumption during adolescence in a mouse model of binge drinking alters the intrinsic  
642 excitability and function of the prefrontal cortex through a reduction in the hyperpolarization-  
643 activated cation current. *J Neurosci*.
- 644 Sarihi, A., Jiang, B., Komaki, A., Sohya, K., Yanagawa, Y., Tsumoto, T., 2008. Metabotropic  
645 glutamate receptor type 5-dependent long-term potentiation of excitatory synapses on fast-  
646 spiking GABAergic neurons in mouse visual cortex. *J Neurosci* 28, 1224-1235.
- 647 Seif, T., Chang, S. J., Simms, J. A., Gibb, S. L., Dadgar, J., Chen, B. T., Harvey, B. K., Ron, D.,  
648 Messing, R. O., Bonci, A., Hopf, F. W., 2013. Cortical activation of accumbens hyperpolarization-  
649 active NMDARs mediates aversion-resistant alcohol intake. *Nat Neurosci* 16, 1094-1100.
- 650 Siciliano, C. A., Noamany, H., Chang, C. J., Brown, A. R., Chen, X., Leible, D., Lee, J. J., Wang,  
651 J., Vernon, A. N., Vander Weele, C. M., Kimchi, E. Y., Heiman, M., Tye, K. M., 2019. A cortical-  
652 brainstem circuit predicts and governs compulsive alcohol drinking. *Science* 366, 1008-1012.
- 653 Sohal, V. S., Zhang, F., Yizhar, O., Deisseroth, K., 2009. Parvalbumin neurons and gamma  
654 rhythms enhance cortical circuit performance. *Nature* 459, 698-702.



- 655 Squeglia, L. M., Sorg, S. F., Schweinsburg, A. D., Wetherill, R. R., Pulido, C., Tapert, S. F., 2012.  
656 Binge drinking differentially affects adolescent male and female brain morphometry.  
657 *Psychopharmacology (Berl)* 220, 529-539.
- 658 Taniguchi, H., He, M., Wu, P., Kim, S., Paik, R., Sugino, K., Kvitsiani, D., Fu, Y., Lu, J., Lin, Y.,  
659 Miyoshi, G., Shima, Y., Fishell, G., Nelson, S. B., Huang, Z. J., 2011. A resource of Cre driver  
660 lines for genetic targeting of GABAergic neurons in cerebral cortex. *Neuron* 71, 995-1013.
- 661 Trantham-Davidson, H., Burnett, E. J., Gass, J. T., Lopez, M. F., Mulholland, P. J., Centanni, S.  
662 W., Floresco, S. B., Chandler, L. J., 2014. Chronic alcohol disrupts dopamine receptor activity  
663 and the cognitive function of the medial prefrontal cortex. *J Neurosci* 34, 3706-3718.
- 664 Trantham-Davidson, H., Centanni, S. W., Garr, S. C., New, N. N., Mulholland, P. J., Gass, J. T.,  
665 Glover, E. J., Floresco, S. B., Crews, F. T., Krishnan, H. R., Pandey, S. C., Chandler, L. J., 2017.  
666 Binge-Like Alcohol Exposure During Adolescence Disrupts Dopaminergic Neurotransmission in  
667 the Adult Prelimbic Cortex. *Neuropsychopharmacology* 42, 1024-1036.
- 668 Tremblay, R., Lee, S., Rudy, B., 2016. GABAergic Interneurons in the Neocortex: From Cellular  
669 Properties to Circuits. *Neuron* 91, 260-292.
- 670 Urbano-Marquez, A., Estruch, R., Fernandez-Sola, J., Nicolas, J. M., Pare, J. C., Rubin, E., 1995.  
671 The greater risk of alcoholic cardiomyopathy and myopathy in women compared with men. *JAMA*  
672 274, 149-154.
- 673 Vargas, W. M., Bengston, L., Gilpin, N. W., Whitcomb, B. W., Richardson, H. N., 2014. Alcohol  
674 binge drinking during adolescence or dependence during adulthood reduces prefrontal myelin in  
675 male rats. *J Neurosci* 34, 14777-14782.
- 676 Varodayan, F. P., Sidhu, H., Kreifeldt, M., Roberto, M., Contet, C., 2018. Morphological and  
677 functional evidence of increased excitatory signaling in the prelimbic cortex during ethanol  
678 withdrawal. *Neuropharmacology* 133, 470-480.
- 679 Woodward, J. J., Pava, M. J., 2009. Effects of ethanol on persistent activity and up-States in  
680 excitatory and inhibitory neurons in prefrontal cortex. *Alcohol Clin Exp Res* 33, 2134-2140.
- 681 Zhong, P., Yan, Z., 2016. Distinct Physiological Effects of Dopamine D4 Receptors on Prefrontal  
682 Cortical Pyramidal Neurons and Fast-Spiking Interneurons. *Cereb Cortex* 26, 180-191.
- 683

684 **Figure Legends**

685 **Figure 1. Sex differences in voluntary ethanol consumption under an intermittent access**  
686 **schedule. (A)** Mice underwent 4 weeks of voluntary drinking during which ethanol was provided  
687 every other day on an intermittent access (IA) schedule. The ethanol concentration was ramped  
688 during the first week and set at 20% for the duration of the study. Female mice (light circles)  
689 displayed increased ethanol intake relative to male mice (dark squares) over the duration of the  
690 study (Least squares best-fit, one-phase association: 95% confidence intervals of plateaus {27.1  
691 to 33.6 g/kg;  $r^2 = 0.46$ } vs {21.5 to 25.4 g/kg;  $r^2 = 0.53$ }). N = 9 mice per group. **(B)** Female mice  
692 drank more during the last week of the IA ethanol paradigm ( $30.2 \pm 2.5$  vs  $22.6 \pm 1.7$  g/kg, \*:  $p <$   
693  $0.05$ , t-test). N = 9. **(C-D)** No sex difference in preference for ethanol over concurrently available  
694 water across the IA ethanol paradigm or during the last week of drinking. N = 9.

695  
696 **Figure 2. Parvalbumin (PV)-(+)** neurons display functional characteristics of fast-spiking  
697 **interneurons. (A)** Representative 4X image displaying tdTomato fluorescence in deep layers of  
698 the mouse prefrontal cortex. Boxed area indicates prelimbic subregion. Inset, 40X magnification  
699 image showing individual PV-expressing interneurons. M, medial; D, dorsal. **(B)** Whole-cell  
700 patch-clamp recordings were made from identified neurons in the PFC. Representative current-  
701 clamp recordings from an unlabeled pyramidal cell (left, black) and a tdTomato-labeled PV-IN  
702 (right, red). The pyramidal cell displays a hyperpolarization-activated sag and accommodating  
703 spike firing, physiological features that are minimal or absent in PV-INs. Scale bars indicate 20  
704 mV and 250 ms. **(C)** Resting membrane potential ( $V_m$ ) in PV-INs from female mice (circles) and  
705 male mice (squares).  $n/N = 17-20/8-9$  cells/mice per group. **(D)** No difference in membrane  
706 resistance ( $R_m$ ) between PV-INs from female and male mice.  $n/N = 17-20/8-9$ . **(E)** No difference  
707 in current-evoked spiking between PV-INs from female and male mice.  $n/N = 16-18/8-9$ . **(F)** No  
708 difference in hyperpolarization sag ratio between PV-INs from female and male mice.  $n/N =$

709 18/9, 20/8. **(G)** PV-INs from female mice display greater medium afterhyperpolarization (mAHP)  
710 than PV-INs from male mice ( $2.71 \pm 0.30$  vs  $1.72 \pm 0.22$  mV, \*\*:  $p < 0.01$ , t-test). n/N = 18-20/8-  
711 9. **(H)** No difference in spontaneous excitatory postsynaptic current (sEPSC) amplitude between  
712 PV-INs from female and male mice. n/N = 16/7-9. **(I)** No difference in the mean of sEPSC  
713 frequency between PV-INs from female and male mice. A difference in the variance of sEPSC  
714 frequency was observed between female and male mice ( $F_{16,15} = 3.526$ , \$:  $p < 0.01$ , F test to  
715 compare variances). n/N = 16-17/7-9.

716

717 **Figure 3. Somatostatin (SST)-(+)** neurons display functional characteristics of Martinotti  
718 cells. **(A)** A representative 4X image displaying tdTomato fluorescence in deep layers of the  
719 mouse prefrontal cortex (PFC). Boxed area indicates prelimbic subregion of the mouse PFC.  
720 Inset, 40X magnification image showing individual SST-expressing interneurons. M, medial; D,  
721 dorsal. **(B)** Whole-cell patch-clamp recordings were made from identified neurons in the PFC.  
722 Representative current-clamp recordings from an unlabeled pyramidal cell (left, black) and a  
723 tdTomato-labeled SST-IN (right, blue). The pyramidal cell displays modest input resistance ( $R_m$ )  
724 and does not fire during 25 pA current injection current. In contrast, most SST-INs display high  
725 membrane resistance ( $R_m$ ) and fire action potentials in response to minimal current injection and  
726 hyperpolarization rebound. Scale bars indicate 20 mV and 250 ms. **(C)** Resting membrane  
727 potential ( $V_m$ ) in SST-INs from female mice (circles) and male mice (squares). n/N = 12/3  
728 cells/mice per group. **(D)** No difference in  $R_m$  between SST-INs from female and male mice. n/N  
729 = 12/3, 14/3. **(E)** No difference in current-evoked spiking between SST-INs from female and  
730 male mice. n/N = 12/3. **(F)** No difference in hyperpolarization sag ratio between SST-INs from  
731 female and male mice. n/N = 12-13/3. **(G)** No difference in medium afterhyperpolarization  
732 (mAHP) in SST-INs from female mice and male mice. n/N = 11-13/3. **(H)** No difference in  
733 spontaneous excitatory postsynaptic current (sEPSC) amplitude between SST-INs from female

734 and male mice. n/N = 11-14/3. **(I)** No difference in the mean of sEPSC frequency between SST-  
735 INs from female and male mice. n/N = 11-14/3.

736

737 **Figure 4. Intermittent ethanol increases medium afterhyperpolarization (mAHP) in**

738 **parvalbumin (PV-IN) and somatostatin (SST-IN) interneurons in male mice. (A)** Modest

739 increase in spiking during large current injections in PV-INs from IA ethanol treated female mice

740 relative to controls. (Two-way RM ANOVA main effect of input:  $F_{12,432} = 88.44$ ,  $p < 0.0001$ ; main

741 effect of IA ethanol:  $F_{1,36} = 0.7002$ , n.s.; input x IA ethanol interaction:  $F_{12,432} = 2.213$ ,  $p < 0.02$ ).

742 n/N = 17-19/5 cells/mice per group. **(B)** No difference in mAHP in IA ethanol PV-INs relative to

743 controls in female mice n/N = 17-19/5. **(C)** Increased spiking in response to current injections in

744 PV-INs from IA ethanol treated male mice relative to controls. (Two-way RM ANOVA main effect

745 of input:  $F_{12,348} = 68.39$ ,  $p < 0.0001$ ; main effect of IA ethanol:  $F_{1,29} = 6.138$ ,  $p < 0.02$ ; input x IA

746 ethanol interaction:  $F_{12,348} = 2.796$ ,  $p < 0.002$ ; \*:  $p < 0.05$ , \*\*:  $p < 0.01$ , Bonferonni post-tests).

747 n/N = 16-17/4. **(D)** Enhanced mAHP in IA ethanol-treated PV-INs relative to controls in male

748 mice ( $3.08 \pm 0.21$  vs  $1.82 \pm 0.24$  mV, \*\*\*:  $p < 0.001$ , t-test). n/N = 16-17/5. **(E-F)** In female mice,

749 no differences were observed in SST-IN current-evoked firing or mAHP between control (filled

750 circles) and IA ethanol (open circles) treatment groups n/N = 14-15/4-5. **(G)** No difference in

751 current-evoked spiking in SST-INs from IA ethanol treated male mice relative to controls. n/N =

752 15-16/4. **(H)** Increased mAHP in IA ethanol SST-INs relative to controls in male mice ( $3.08 \pm$

753  $0.21$  vs  $1.82 \pm 0.24$  mV, \*\*\*:  $p < 0.001$ , t-test). n/N = 15/4.

754

755 **Figure 5. Intermittent access to ethanol generates diametrically opposing changes to**

756 **excitatory synaptic strength onto parvalbumin-expressing interneurons (PV-INs) based**

757 **on sex. (A)** Left, Representative spontaneous excitatory postsynaptic current (sEPSC) traces

758 from PV-INs from control (black) and IA ethanol (red) female mice. Scale bars indicate 10 pA,

759 100 ms. Right, Averaged sEPSC from representative experiment. Scale bars indicate 5 pA, 2  
760 ms. **(B)** Decreased sEPSC amplitude in PV-INs from control and IA ethanol female mice. ( $14.5$   
761  $\pm 0.7$  vs  $17.9 \pm 1.5$  pA, \*:  $p < 0.05$ , t-test)  $n/N = 17/5$  cells/mice per group **(C)** PV-INs from  
762 female mice given IA ethanol exhibited decreased sEPSC frequency relative to controls ( $15.2 \pm$   
763  $1.3$  vs  $21.2 \pm 1.6$  Hz, \*\*:  $p < 0.01$ , t-test).  $n/N = 17-19/5$ . **(D)** No group difference in paired-pulse  
764 ratio (PPR) between control and IA ethanol female mice across several interstimulus intervals  
765 (ISIs).  $n/N = 7-9/3$ . **(E)** Left, Representative sEPSC traces from PV-INs from control (black) and  
766 IA ethanol (red) male mice. Scale bars indicate 10 pA, 100 ms. Right, Averaged sEPSC from  
767 representative experiment. Scale bars indicate 5 pA, 2 ms. **(F)** Greater sEPSC amplitude in PV-  
768 INs from IA ethanol group relative to control male mice ( $20.7 \pm 1.4$  vs  $15.9 \pm 1.0$  pA, \*\*:  $p < 0.01$ ,  
769 t-test).  $n/N = 16/5$ . **(G)** PV-INs from male mice given IA ethanol displayed increased sEPSC  
770 frequency relative to controls ( $25.1 \pm 2.8$  vs  $16.5 \pm 1.3$  Hz, \*\*:  $p < 0.01$ , t-test).  $n/N = 16-17/5$ .  
771 **(H)** No group difference in PPR between control and IA ethanol male mice.  $n/N = 7-9/3$ .

772

773 **Figure 6. Intermittent access to ethanol decreases excitatory synaptic strength onto**  
774 **somatostatin interneurons (SST-INs).** **(A)** Left, Representative spontaneous excitatory  
775 postsynaptic current (sEPSC) traces from SST-INs from control (black) and IA ethanol (blue)  
776 female mice. Scale bars indicate 10 pA, 100 ms. Right, Averaged sEPSC from representative  
777 experiment. Scale bars indicate 5 pA, 2 ms. **(B)** Decreased sEPSC amplitude was observed in  
778 SST-INs from IA ethanol female mice relative to controls. controls ( $11.7 \pm 0.5$  vs  $13.8 \pm 0.8$  pA,  
779 \*:  $p < 0.05$ , t-test).  $n/N = 12-14/4$  cells/mice per group. **(C)** SST-INs from female mice given IA  
780 ethanol exhibited decreased sEPSC frequency relative to controls ( $5.7 \pm 0.9$  vs  $9.9 \pm 1.8$  Hz, \*:  
781  $p < 0.05$ , t-test).  $n/N = 12-14/4$  cells/mice. **(D)** SST-IN paired-pulse ratio (PPR) did not differ  
782 between control and IA ethanol female mice across multiple interstimulus intervals (ISIs).  $n/N =$   
783  $9-11/3-4$ . **(E)** Left, Representative sEPSC traces from SST-INs from control (black) and IA  
784 ethanol (blue) male mice. Scale bars indicate 10 pA, 100 ms. Right, Averaged sEPSC from

785 representative experiment. Scale bars indicate 5 pA, 2 ms. **(F)** Decreased sEPSC amplitude in  
786 SST-INs from IA ethanol group relative to control male mice ( $10.6 \pm 0.6$  vs  $12.9 \pm 0.9$  pA, \*:  $p <$   
787  $0.05$ , t-test).  $n/N = 14-15/5$ . **(G)** SST-INs from male mice given IA ethanol displayed decreased  
788 sEPSC frequency relative to controls ( $4.1 \pm 0.6$  vs  $6.9 \pm 1.1$  Hz, \*:  $p < 0.05$ , t-test).  $n/N = 16-$   
789  $17/5$ . **(H)** Decreased PPR in IA ethanol male mice (Two-way RM ANOVA main effect of ISI:  $F_{4,84}$   
790  $= 24.85$ ,  $p < 0.0001$ ; main effect of IA ethanol:  $F_{1,21} = 6.897$ ,  $p < 0.02$ ; input x IA ethanol  
791 interaction:  $F_{12,84} = 4.6$ ,  $p < 0.003$ ; \*:  $p < 0.05$ , \*\*:  $p < 0.01$ , Bonferonni post-tests)  $n/N = 11-12/4-$   
792  $5$ .

793

794 **Figure S1. Minimal adaptations to several interneuron membrane properties following**  
795 **intermittent access to ethanol. (A-C)** In female mice, no differences were observed in  
796 parvalbumin interneuron (PV-IN) resting membrane potential ( $V_m$ ), membrane resistance ( $R_m$ ),  
797 or sag ratio between control (filled circles) and IA ethanol (open circles) treatments.  $n/N = 17-$   
798  $20/5$  cells/mice per group. **(D-F)** In male mice, no differences in PV-IN  $V_m$ ,  $R_m$ , or sag ratio were  
799 detected between control (filled squares) and IA ethanol (open squares) treatments.  $n/N = 15-$   
800  $17/4$ . **(G-I)** In female mice, no differences were observed in somatostatin interneuron (SST-IN)  
801  $V_m$ ,  $R_m$ , or sag ratio between control and IA ethanol treatments.  $n/N = 13-20/4-5$ . **(J)** In male  
802 mice, SST-IN  $V_m$  did not differ between control and IA ethanol treatments.  $n/N = 15-17/4$ . **(K)** IA  
803 ethanol was associated with increased  $R_m$  in SST-INs from male mice ( $389.1 \pm 33.3$  vs  $295.6 \pm$   
804  $25.7$  M $\Omega$ , \*:  $p < 0.05$ , t-test).  $n/N = 14-16/4$ . **(L)** No difference in SST-IN sag ratio between  
805 control and IA ethanol male mice.  $n/N = 14-16/4$ .

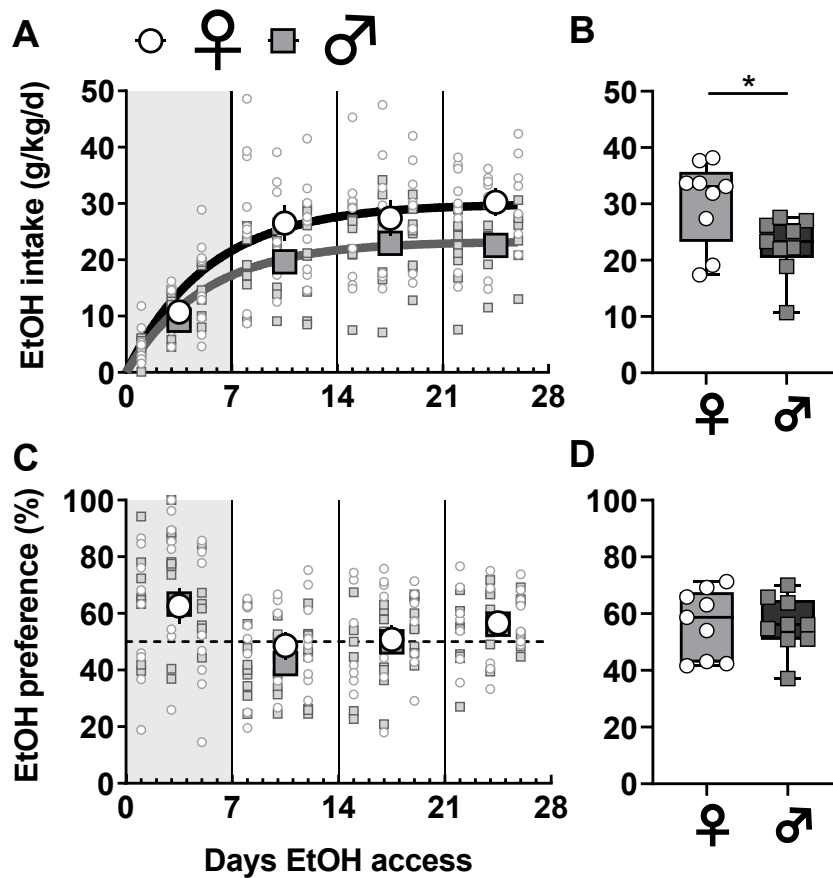

**Figure 1. Sex differences in voluntary ethanol consumption under an intermittent access schedule. (A)** Mice underwent 4 weeks of voluntary drinking during which ethanol was provided every other day on an intermittent access (IA) schedule. The ethanol concentration was ramped during the first week and set at 20% for the duration of the study. Female mice (light circles) displayed increased ethanol intake relative to male mice (dark squares) over the duration of the study (Least squares best-fit, one-phase association: 95% confidence intervals of plateaus {27.1 to 33.6 g/kg;  $r^2 = 0.46$ } vs {21.5 to 25.4 g/kg;  $r^2 = 0.53$ }).  $N = 9$  mice per group. **(B)** Female mice drank more during the last week of the IA ethanol paradigm ( $30.2 \pm 2.5$  vs  $22.6 \pm 1.7$  g/kg, \*:  $p < 0.05$ , t-test). **(C-D)** No sex difference in preference for ethanol over concurrently available water across the IA ethanol paradigm or during the last week of drinking.

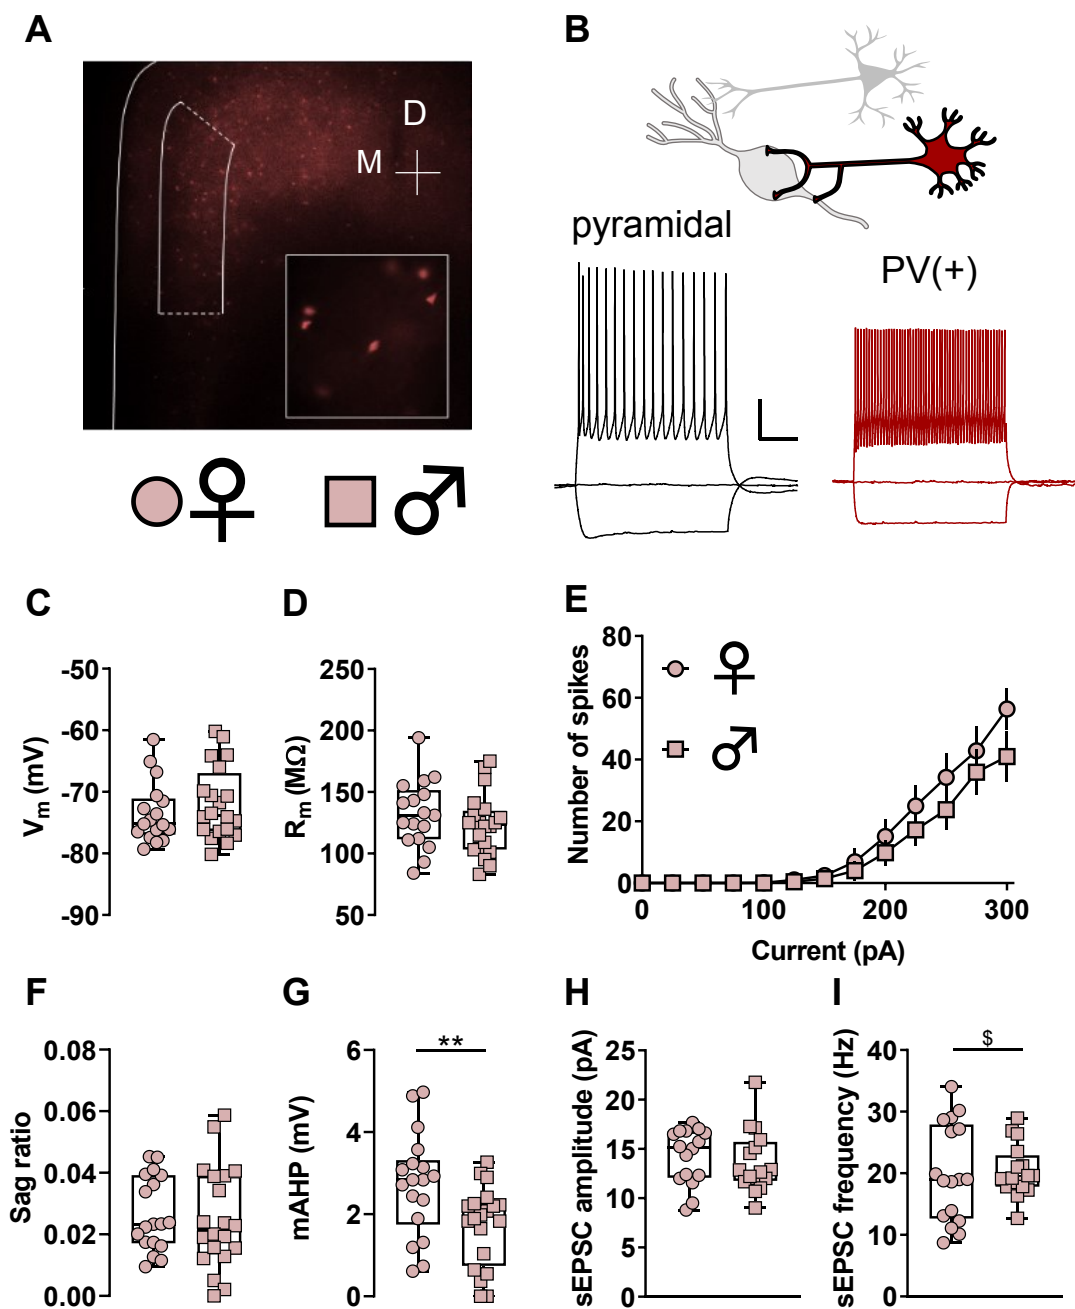

**Figure 2. Parvalbumin (PV)-(+) neurons display functional characteristics of fast-spiking interneurons. (A)** Representative 4X image displaying TdTomato fluorescence in deep layers of the mouse prefrontal cortex. Boxed area indicates prelimbic subregion. Inset, 40X magnification image showing individual PV-expressing interneurons. M, medial; D, dorsal. **(B)** Whole-cell patch-clamp recordings were made from identified neurons in the PFC. Representative current-clamp recordings from an unlabeled pyramidal cell (left, black) and a TdTomato-labeled PV-IN (right, red). The pyramidal cell displays a hyperpolarization-activated sag and accommodating spike firing, physiological features that are minimal or absent in PV-INs. Scale bars indicate 20 mV and 250 ms. **(C)** Resting membrane potential ( $V_m$ ) in PV-INs from female mice (circles) and male mice (squares).  $n/N = 17/9, 20/8$  cells / mice. **(D)** No difference in membrane resistance ( $R_m$ ) between PV-INs from female and male mice.  $n/N = 17/9, 20/8$ . **(E)** No difference in current-evoked spiking between PV-INs from female and male mice.  $n/N = 16/9, 18/8$ . **(F)** No difference in hyperpolarization sag ratio between PV-INs from female and male mice.  $n/N = 18/9, 20/8$ . **(G)** PV-INs from female mice display greater medium afterhyperpolarization (mAHP) than PV-INs from male mice ( $2.71 \pm 0.30$  vs  $1.72 \pm 0.22$  mV, \*\*:  $p < 0.01$ , t-test).  $n/N = 18/9, 20/8$ . **(H)** No difference in spontaneous excitatory postsynaptic current (sEPSC) amplitude between PV-INs from female and male mice.  $n/N = 16/9, 16/7$ . **(I)** No difference in the mean of sEPSC frequency between PV-INs from female and male mice. A difference in the variance of sEPSC frequency was observed between female and male mice ( $F_{16,15} = 3.526$ , \$:  $p < 0.01$ , F test to compare variances).  $n/N = 17/9, 16/7$ .



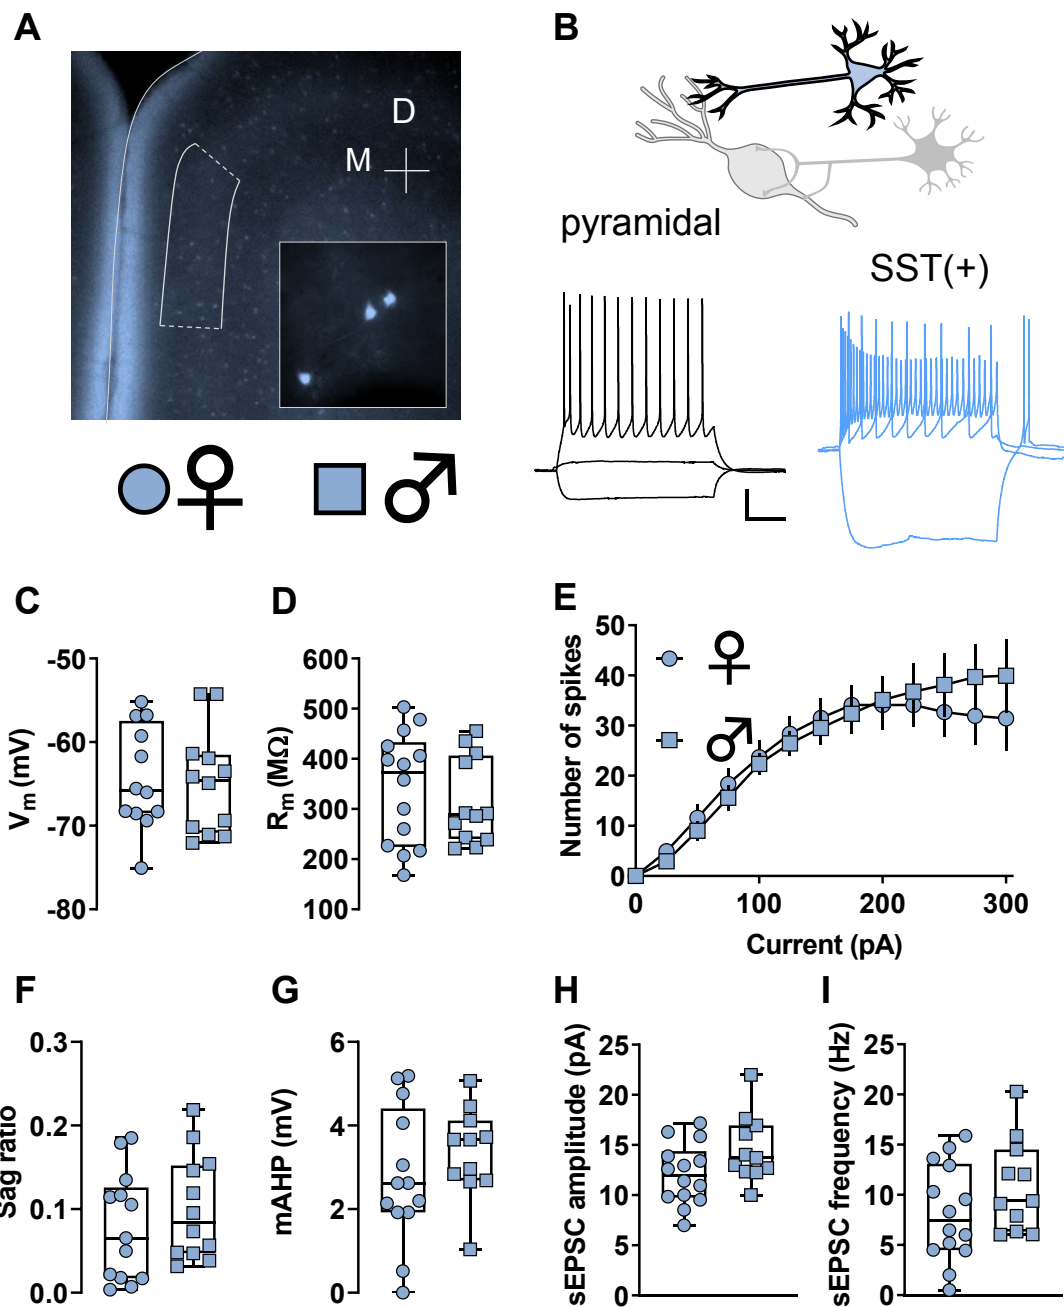

**Figure 3. Somatostatin (SST)-(+) neurons display functional characteristics of Martinotti cells. (A)** A representative 4X image displaying TdTomato fluorescence in deep layers of the mouse prefrontal cortex (PFC). Boxed area indicates prelimbic subregion of the mouse PFC. Inset, 40X magnification image showing individual SST-expressing interneurons. M, medial; D, dorsal. **(B)** Whole-cell patch-clamp recordings were made from identified neurons in the PFC. Representative current-clamp recordings from an unlabeled pyramidal cell (left, black) and a TdTomato-labeled SST-IN (right, blue). The pyramidal cell displays modest input resistance ( $R_m$ ) and does not fire during 25 pA current injection current. In contrast, most SST-INs display high membrane resistance ( $R_m$ ) and fire action potentials in response to minimal current injection and hyperpolarization rebound. Scale bars indicate 20 mV and 250 ms. **(C)** Resting membrane potential ( $V_m$ ) in SST-INs from female mice (circles) and male mice (squares).  $n/N = 12/3$  cells/mice per group. **(D)** No difference in  $R_m$  between SST-INs from female and male mice.  $n/N = 12/3, 14/3$ . **(E)** No difference in current-evoked spiking between SST-INs from female and male mice.  $n/N = 12/3$ . **(F)** No difference in hyperpolarization sag ratio between SST-INs from female and male mice.  $n/N = 13/3, 12/3$ . **(G)** No difference in medium afterhyperpolarization (mAHP) in SST-INs from female mice and male mice.  $n/N = 13/3$ . **(H)** No difference in spontaneous excitatory postsynaptic current (sEPSC) amplitude between SST-INs from female and male mice.  $n/N = 14/3, 11/3$ . **(I)** No difference in the mean of sEPSC frequency between SST-INs from female and male mice.  $n/N = 14/3, 11/3$ .

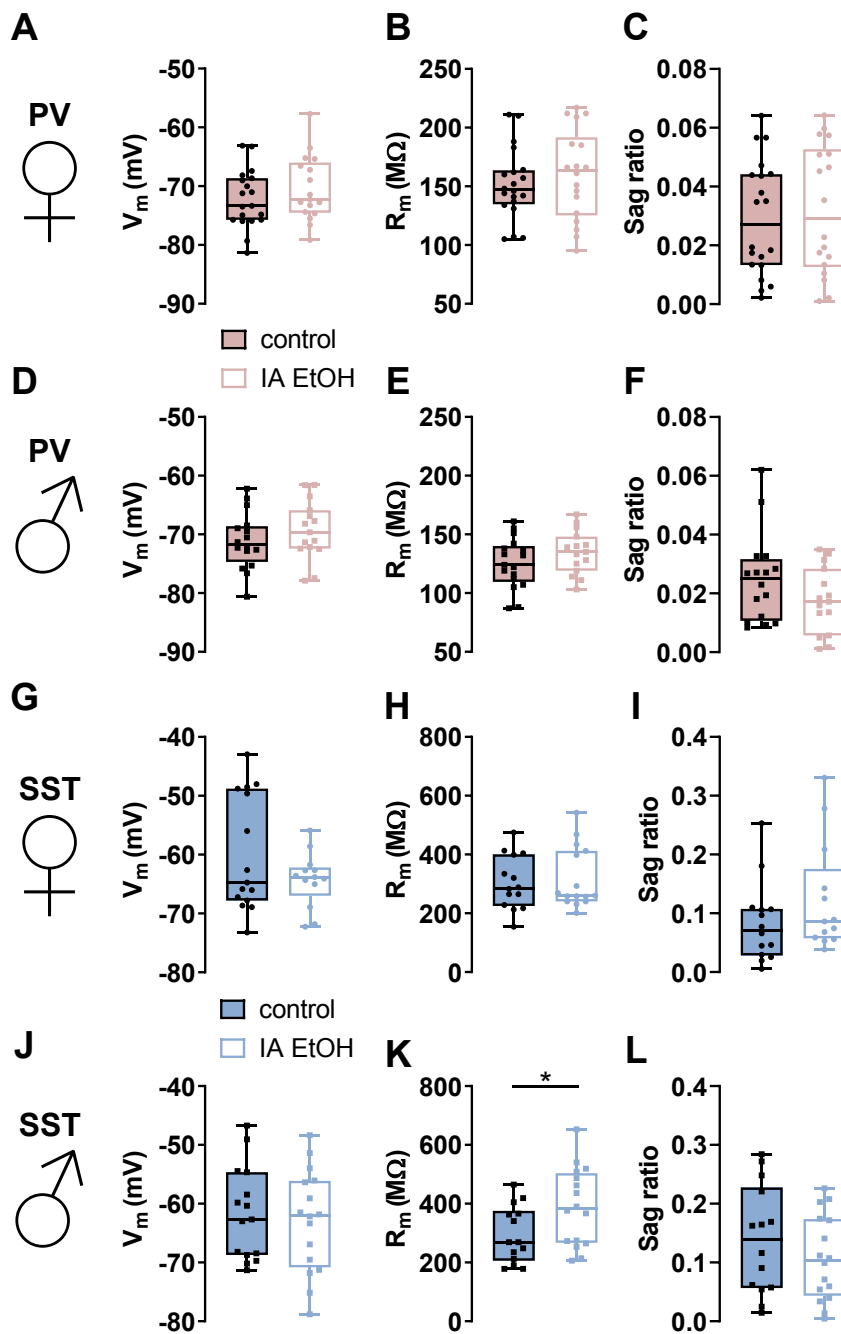

**Figure S1. Minimal adaptations to several interneuron membrane properties following intermittent access to ethanol.** (A-C) In female mice, no differences were observed in parvalbumin interneuron (PV-IN) resting membrane potential ( $V_m$ ), membrane resistance ( $R_m$ ), or sag ratio between control (filled circles) and IA ethanol (open circles) treatments.  $n/N = 17\text{-}20/5$  cells/mice per group. (D-F) In male mice, no differences in PV-IN  $V_m$ ,  $R_m$ , or sag ratio were detected between control (filled squares) and IA ethanol (open squares) treatments.  $n/N = 15\text{-}17/4$ . (G-I) In female mice, no differences were observed in somatostatin interneuron (SST-IN)  $V_m$ ,  $R_m$ , or sag ratio between control and IA ethanol treatments.  $n/N = 13\text{-}20/4\text{-}5$ . (J) In male mice, SST-IN  $V_m$  did not differ between control and IA ethanol treatments.  $n/N = 15\text{-}17/4$ . (K) IA ethanol was associated with increased  $R_m$  in SST-INs from male mice ( $389.1 \pm 33.3$  vs  $295.6 \pm 25.7$  M $\Omega$ , \*:  $p < 0.05$ , t-test).  $n/N = 14\text{-}16/4$ . (L) No difference in SST-IN sag ratio between control and IA ethanol male mice.  $n/N = 14\text{-}16/4$ .

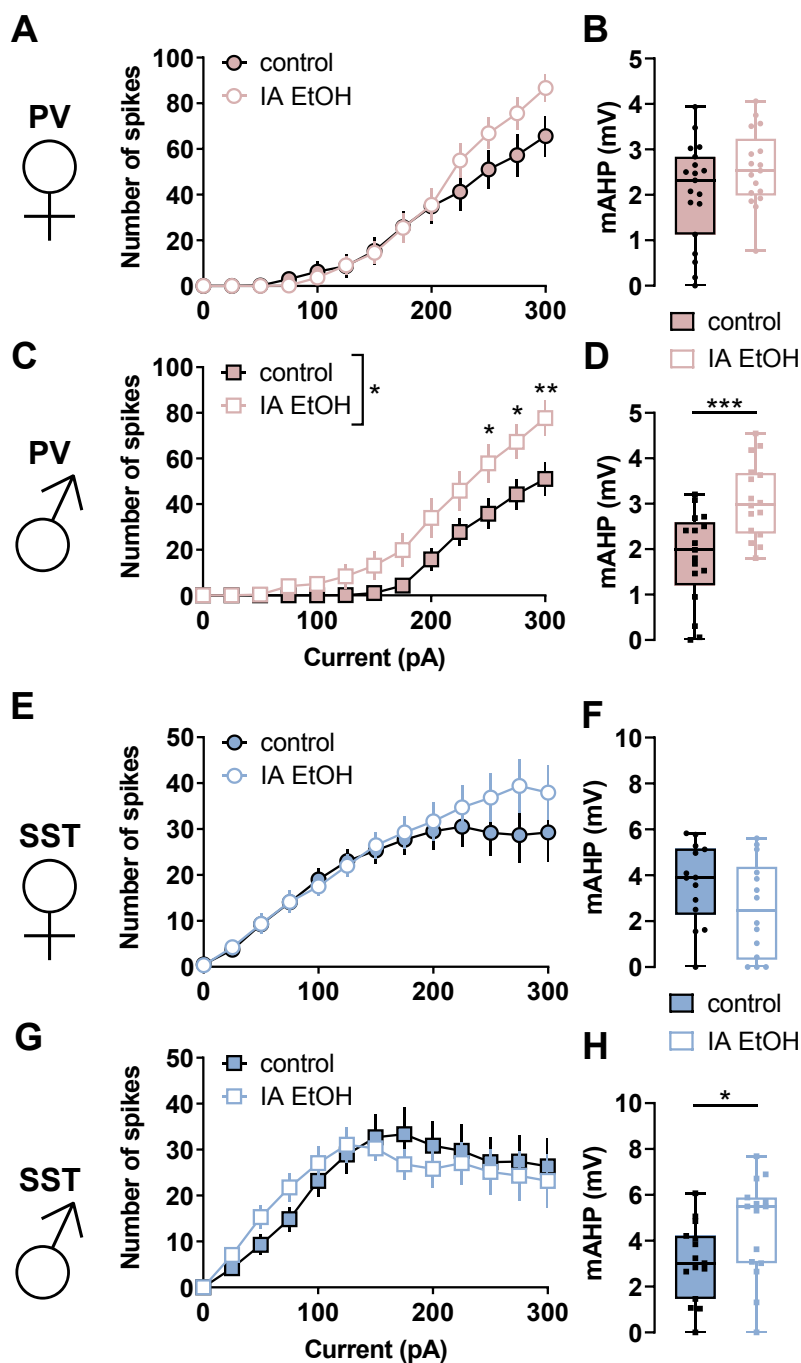

**Figure 4. Intermittent ethanol increases medium afterhyperpolarization (mAHP) in parvalbumin (PV-IN) and somatostatin (SST-IN) interneurons in male mice.** (A) Modest increase in spiking during large current injections in PV-INs from IA ethanol treated female mice relative to controls. (Two-way RM ANOVA main effect of input:  $F_{12,432} = 88.44$ ,  $p < 0.0001$ ; main effect of IA ethanol:  $F_{1,36} = 0.7002$ , n.s.; input x IA ethanol interaction:  $F_{12,432} = 2.213$ ,  $p < 0.02$ ). n/N = 17-19/5 cells/mice per group. (B) No difference in mAHP in IA ethanol PV-INs relative to controls in female mice n/N = 17-19/5. (C) Increased spiking in response to current injections in PV-INs from IA ethanol treated male mice relative to controls. (Two-way RM ANOVA main effect of input:  $F_{12,348} = 68.39$ ,  $p < 0.0001$ ; main effect of IA ethanol:  $F_{1,29} = 6.138$ ,  $p < 0.02$ ; input x IA ethanol interaction:  $F_{12,348} = 2.796$ ,  $p < 0.002$ ; \*,  $p < 0.05$ , \*\*,  $p < 0.01$ , Bonferonni post-tests). n/N = 16-17/4. (D) Enhanced mAHP in IA ethanol-treated PV-INs relative to controls in male mice ( $3.08 \pm 0.21$  vs  $1.82 \pm 0.24$  mV, \*\*\*,  $p < 0.001$ , t-test). n/N = 16-17/5. (E-F) In female mice, no differences were observed in SST-IN current-evoked firing or mAHP between control (filled circles) and IA ethanol (open circles) treatment groups n/N = 13-20/4. (G) No difference in current-evoked spiking in SST-INs from IA ethanol treated male mice relative to controls. n/N = 16-17/4. (H) Increased mAHP in IA ethanol SST-INs relative to controls in male mice ( $3.08 \pm 0.21$  vs  $1.82 \pm 0.24$  mV, \*\*\*,  $p < 0.001$ , t-test). n/N = 16-17/4.

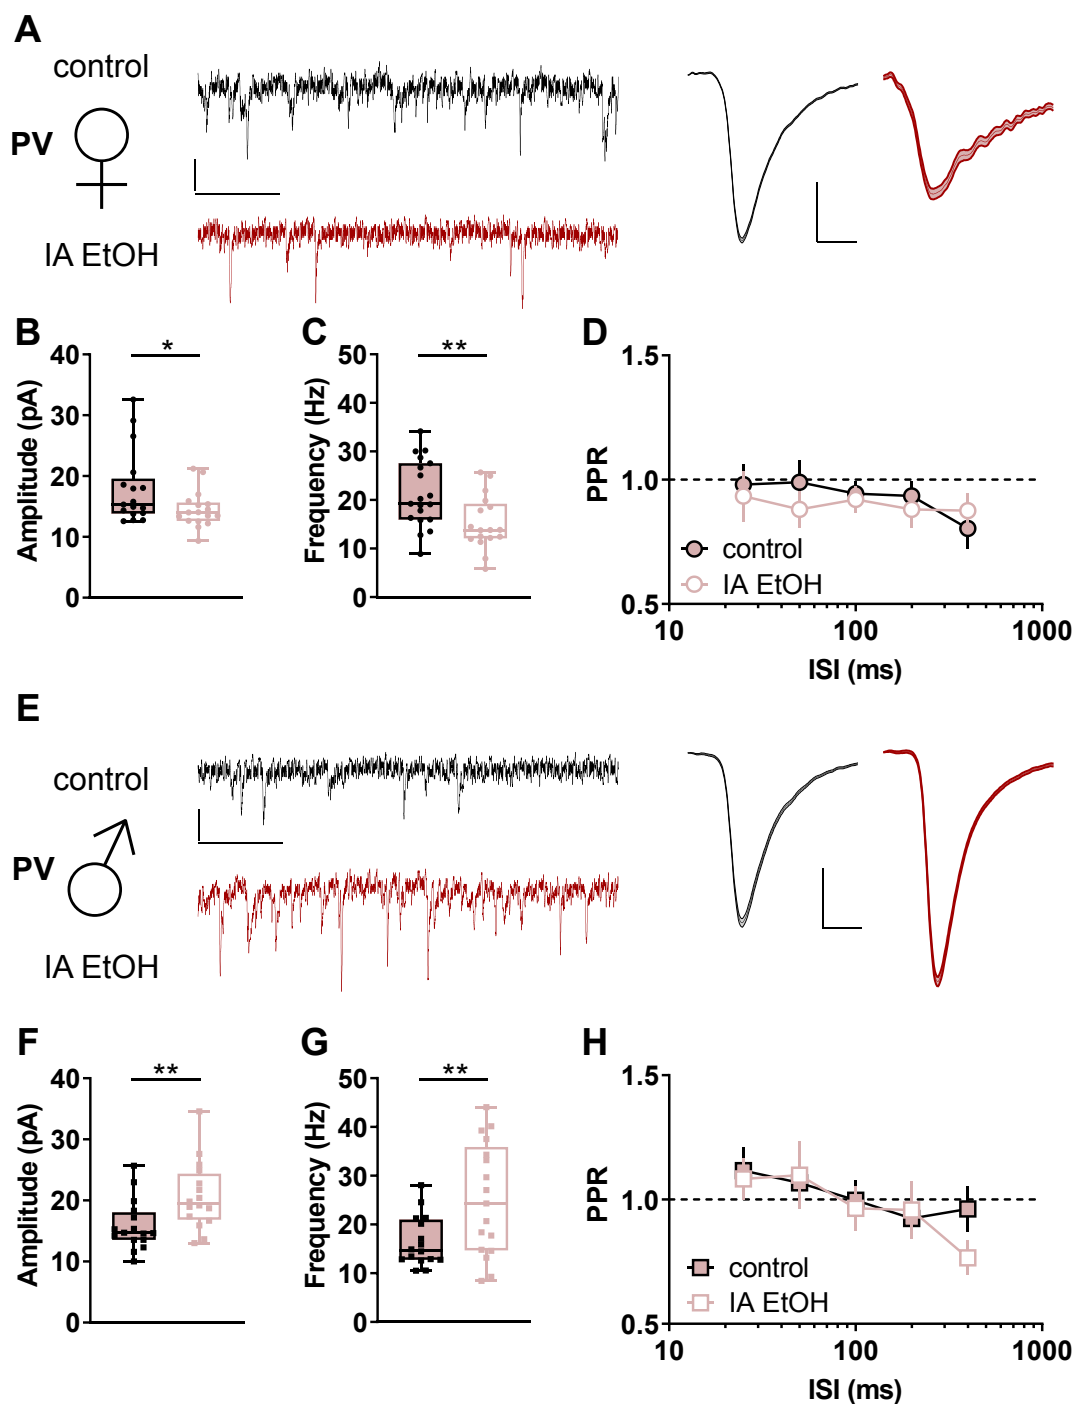

**Figure 5. Intermittent access to ethanol generates diametrically opposing changes to excitatory synaptic strength onto parvalbumin-expressing interneurons (PV-INs) based on sex. (A)** Left, Representative spontaneous excitatory postsynaptic current (sEPSC) traces from PV-INs from control (black) and IA ethanol (red) female mice. Scale bars indicate 10 pA, 100 ms. Right, Averaged sEPSC from representative experiment. Scale bars indicate 5 pA, 2 ms. **(B)** Decreased sEPSC amplitude in PV-INs from control and IA ethanol female mice. ( $14.5 \pm 0.7$  vs  $17.9 \pm 1.5$  pA, \*:  $p < 0.05$ , t-test)  $n/N = 17/5$  cells/mice per group **(C)** PV-INs from female mice given IA ethanol exhibited decreased sEPSC frequency relative to controls ( $15.2 \pm 1.3$  vs  $21.2 \pm 1.6$  Hz, \*\*:  $p < 0.01$ , t-test).  $n/N = 17-19/5$ . **(D)** No group difference in paired-pulse ratio (PPR) between control and IA ethanol female mice across several interstimulus intervals (ISIs).  $n/N = 7-9/3$ . **(E)** Left, Representative sEPSC traces from PV-INs from control (black) and IA ethanol (red) male mice. Scale bars indicate 10 pA, 100 ms. Right, Averaged sEPSC from representative experiment. Scale bars indicate 5 pA, 2 ms. **(F)** Greater sEPSC amplitude in PV-INs from IA ethanol group relative to control male mice ( $20.7 \pm 1.4$  vs  $15.9 \pm 1.0$  pA, \*\*:  $p < 0.01$ , t-test).  $n/N = 16/5$ . **(G)** PV-INs from male mice given IA ethanol displayed increased sEPSC frequency relative to controls ( $25.1 \pm 2.8$  vs  $16.5 \pm 1.3$  Hz, \*\*:  $p < 0.01$ , t-test).  $n/N = 16-17/5$ . **(H)** No group difference in PPR between control and IA ethanol male mice.  $n/N = 7-9/3$ .

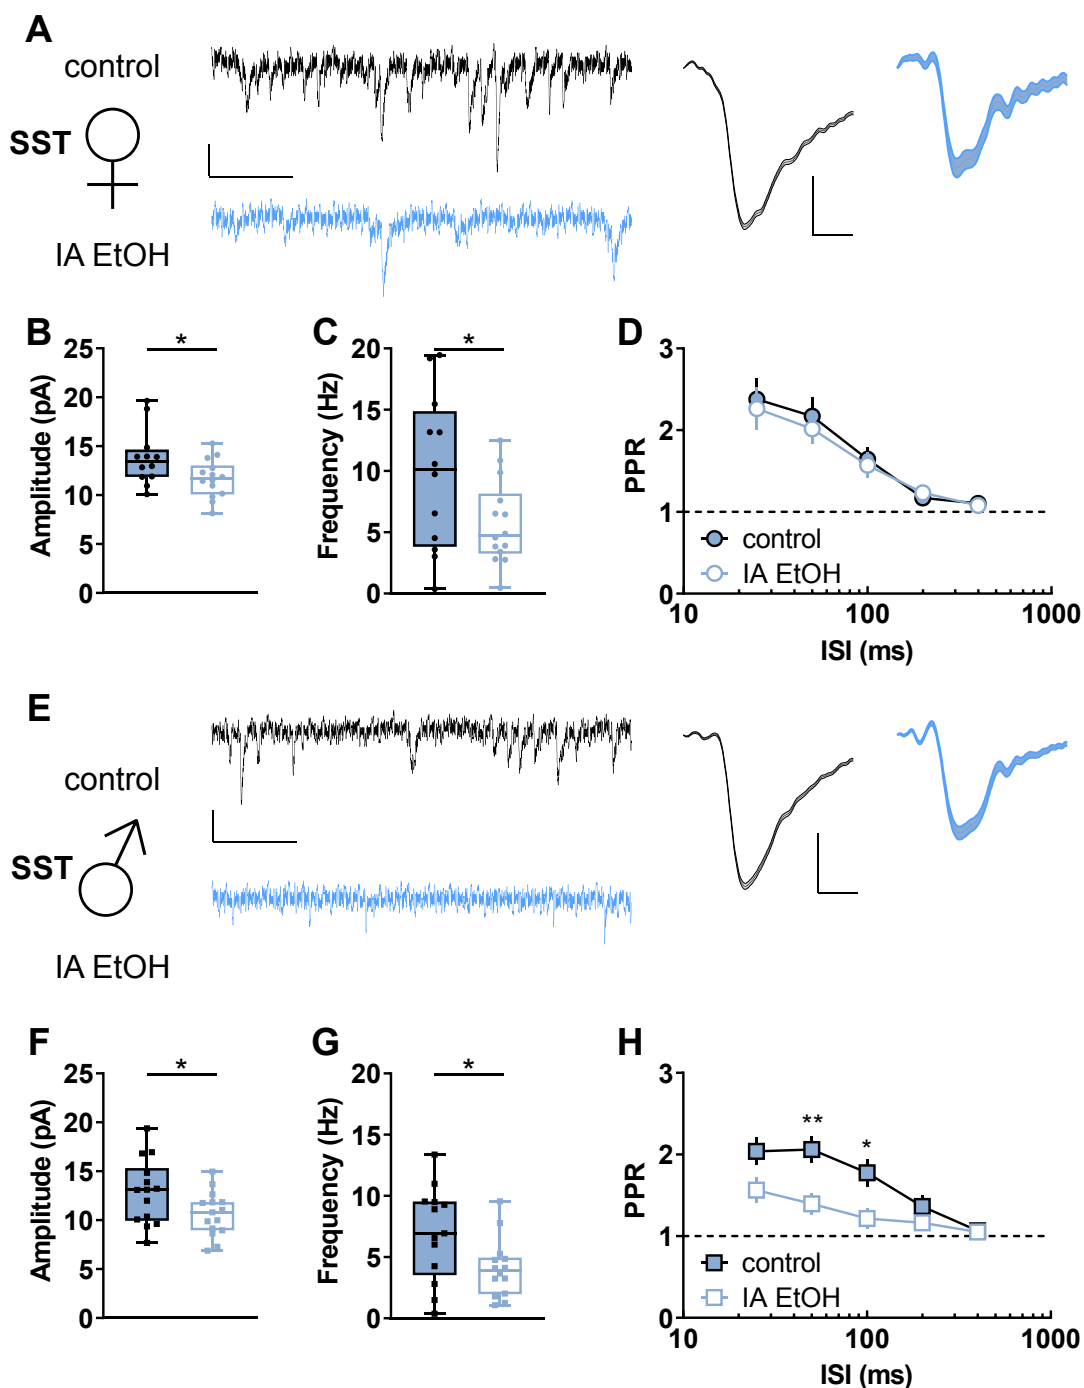

**Figure 6. Intermittent access to ethanol decreases excitatory synaptic strength onto somatostatin interneurons (SST-INs).**

(A) Left, Representative spontaneous excitatory postsynaptic current (sEPSC) traces from SST-INs from control (black) and IA ethanol (blue) female mice. Scale bars indicate 10 pA, 100 ms. Right, Averaged sEPSC from representative experiment. Scale bars indicate 5 pA, 2 ms. (B) Decreased sEPSC amplitude was observed in SST-INs from IA ethanol female mice relative to controls. controls ( $11.7 \pm 0.5$  vs  $13.8 \pm 0.8$  pA, \*:  $p < 0.05$ , t-test). n/N = 12-14/4 cells/mice per group. (C) SST-INs from female mice given IA ethanol exhibited decreased sEPSC frequency relative to controls ( $5.7 \pm 0.9$  vs  $9.9 \pm 1.8$  Hz, \*:  $p < 0.05$ , t-test). n/N = 12-19/4-5 cells/mice. (D) SST-IN paired-pulse ratio (PPR) did not differ between control and IA ethanol female mice across multiple interstimulus intervals (ISIs). n/N = 9-11/3-4. (E) Left, Representative sEPSC traces from SST-INs from control (black) and IA ethanol (blue) male mice. Scale bars indicate 10 pA, 100 ms. Right, Averaged sEPSC from representative experiment. Scale bars indicate 5 pA, 2 ms. (F) Decreased sEPSC amplitude in SST-INs from IA ethanol group relative to control male mice ( $10.6 \pm 0.6$  vs  $12.9 \pm 0.9$  pA, \*:  $p < 0.05$ , t-test). n/N = 14-15/5. (G) SST-INs from male mice given IA ethanol displayed decreased sEPSC frequency relative to controls ( $4.1 \pm 0.6$  vs  $6.9 \pm 1.1$  Hz, \*:  $p < 0.05$ , t-test). n/N = 16-17/5. (H) Decreased PPR in IA ethanol male mice (Two-way RM ANOVA main effect of ISI:  $F_{4,84} = 24.85$ ,  $p < 0.0001$ ; main effect of IA ethanol:  $F_{1,21} = 6.897$ ,  $p < 0.02$ ; input x IA ethanol interaction:  $F_{12,84} = 4.6$ ,  $p < 0.003$ ; \*:  $p < 0.05$ , \*\*:  $p < 0.01$ , Bonferroni post-tests) n/N = 11-12/4-5.
